# 1 **Gut Microbiota predicts Healthy Late-life Aging in Male Mice**

2 Shanlin Ke<sup>1,2</sup>, Sarah J. Mitchell<sup>3,4</sup>, Michael R. MacArthur<sup>3,4</sup>, Alice E. Kane<sup>5</sup>, David A.  
3 Sinclair<sup>5</sup>, Emily M. Venable<sup>6</sup>, Katia S. Chadaideh<sup>6</sup>, Rachel N. Carmody<sup>6</sup>, Francine  
4 Grodstein<sup>1,7</sup>, James R. Mitchell<sup>4</sup>, Yang-Yu Liu<sup>1</sup>

5  
6 <sup>1</sup>*Channing Division of Network Medicine, Brigham and Women's Hospital and Harvard Medical  
7 School, Boston, Massachusetts 02115, USA.*

8 <sup>2</sup>*State Key Laboratory of Pig Genetic Improvement and Production Technology, Jiangxi Agricultural  
9 University 330045, China.*

10 <sup>3</sup>*Department of Molecular Metabolism, Harvard T.H. Chan School of Public Health, Boston, MA,  
11 02115, USA.*

12 <sup>4</sup>*Department of Health Sciences and Technology, ETH Zurich, Zurich 8005 Switzerland.*

13 <sup>5</sup>*Blavatnik Institute, Dept. of Genetics, Paul F. Glenn Center for Biology of Aging Research at  
14 Harvard Medical School, Boston, MA 02115 USA.*

15 <sup>6</sup>*Department of Human Evolutionary Biology, Harvard University, Cambridge, MA, 02138, USA.*

16 <sup>7</sup>*Department of Epidemiology, Harvard T.H. Chan School of Public Health, Boston, MA, 02115, USA.*

17

18 #To whom correspondence should be addressed: Y.-Y.L. ([yyl@channing.harvard.edu](mailto:yyl@channing.harvard.edu)) and  
19 S.J.M. ([sarahjayne.mitchell@hest.ethz.ch](mailto:sarahjayne.mitchell@hest.ethz.ch))

20

21 Calorie restriction (CR) extends lifespan and retards age-related chronic diseases in most  
22 species. There is growing evidence that the gut microbiota has a pivotal role in host health  
23 and age-related pathological conditions. Yet, it is still unclear how CR and the gut microbiota  
24 are related to healthy aging. Here we report findings from a small longitudinal study of male  
25 C57BL/6 mice maintained on either *ad libitum* or mild (15%) CR diets from 21 months of  
26 age and tracked until natural death. We demonstrate that CR results in a significant reduction  
27 in frailty index (FI), a well-established indicator of aging. We observed significant alterations  
28 in bacterial load, diversity, and compositional patterns of the mouse gut microbiota during the  
29 aging process. Interrogating the FI-related microbial features using machine learning  
30 techniques, we show that gut microbial signatures from 21-month-old mice can predict the  
31 healthy aging of 30-month-old mice with reasonable accuracy. This study deepens our  
32 understanding of the links between CR, gut microbiota, and frailty in the aging process of  
33 mice.

34

35

36

37

## 38 **Introduction**

39 The proportional population of older persons is growing across the globe<sup>1</sup>. This demographic  
40 shift will increase the prevalence of age-related disease and place a significant burden on  
41 health costs and social care. Moreover, increased longevity (i.e., lifespan) does not necessarily  
42 translate to better quality of life (i.e., healthspan)<sup>2</sup>. Thus, it is imperative to improve our  
43 understanding of mechanisms underlying aging processes and develop practical interventions  
44 to promote healthy aging and delay age-related diseases.

45 Aging is one of the most complex biological processes that affects a wide array of  
46 physiological, genomic, metabolic, and immunological functions<sup>9,10</sup>. These age-related  
47 functional changes can lead to organ and systemic decline, which ultimately results in death.  
48 There is now growing evidence that the gut microbiota interacts with these physiological  
49 functions, and thereby plays a pivotal role in host health and age-related pathological  
50 conditions<sup>3-5</sup>. The gut microbiota is regulated by a complex interplay between host and  
51 environmental factors, including age, diet, antibiotics, genetics, and lifestyle<sup>7,8</sup>. In turn,  
52 changes in the gut microbiota can alter host physiology, increasing the incidence and/or  
53 severity of many diseases that contribute to morbidity and mortality in later life, such as  
54 inflammatory bowel disease<sup>17</sup>, type 2 diabetes<sup>19</sup>, obesity<sup>20</sup>, cardiovascular disease<sup>21</sup>, and  
55 neurodegenerative disease<sup>22</sup>. During host aging, the gut microbiota undergoes dramatic  
56 changes in composition and function<sup>12-16</sup>. The gut microbiota of elderly people is different  
57 from that of adults<sup>14,23,24</sup>, and microbial compositions in the elderly correlate with measures  
58 of frailty, barrier dysfunction, gut motility, and inflammation<sup>25</sup>. Nevertheless, the extent to  
59 which these changes result from host aging or contribute to it remains unclear. Unlike other  
60 organs, the gut microbiota might not be expected to follow the same general trajectory of  
61 somatic senescence<sup>11</sup>.

62 Calorie restriction (CR), a dietary regimen that reduces the consumption of food without  
63 resulting in malnutrition, has been shown in animal models to retard development of  
64 age-related chronic diseases and extend the lifespan<sup>26-29</sup>. In addition to effects on host  
65 physiology, CR can also reshape the gut microbial community in both humans<sup>30,31</sup> and animal  
66 models<sup>32-34</sup>. CR-induced alterations to the gut microbiome might play a role in extending  
67 lifespan and healthspan and delaying the onset of age-related disorders. In this study, we  
68 evaluate how the gut microbiota changes during the aging process in mice and test whether  
69 gut microbial features can predict healthy aging. To do this, we performed quantitative PCR  
70 (qPCR) targeting the 16S rRNA gene and 16S rRNA gene sequencing of bacterial DNA  
71 extracted from fecal samples from a cohort of aging male mice tracked from 21 months of  
72 age. We investigated associations between these microbial signatures and biomarkers of host  
73 condition, including weight, food intake, hematological markers, and frailty index (FI), a  
74 validated biomarker of biological age that is a strong predictor of mortality, morbidity, and  
75 other age-related outcomes<sup>35</sup>. Examining how signatures in the gut microbiota predict future

76 aging status can illuminate the utility of the gut microbiota as an early indicator of healthy  
77 aging.

78

## 79 **Results**

### 80 **Experimental design**

81 The experimental design is shown in Fig. 1. Following baseline phenotypic measurements  
82 (body weight, food intake, frailty index, grip strength, and fecal collection), adult male  
83 C57BL/6 mice were randomized at 21 months of age into *ad libitum* diet (AL, n=14) or mild  
84 calorie restriction diet (CR, 15% fewer calories than their peers consuming an *ad libitum* diet,  
85 n=8) groups and followed longitudinally until death. From each birth cohort that we received,  
86 we randomized the mice equally into groups to avoid a strong birth-cohort effect. We  
87 repeated phenotypic measurements after 9 months (30 months of age) and recorded survival.  
88 We performed qPCR targeting the 16S rRNA gene as well as 16S rRNA gene sequencing on  
89 44 stool samples, collected at 21 and 30 months of age, from 22 mice.

90

### 91 **The association of the physiological characteristics with chronological age**

92 The mouse clinical frailty index (FI) is based on established clinical signs of deterioration in  
93 mice<sup>36,37</sup>. Briefly, the clinical assessment includes evaluation of the integument, the  
94 musculoskeletal system, the vestibulocochlear/auditory systems, ocular and nasal systems,  
95 digestive system, urogenital system, respiratory system, signs of discomfort, body weight,  
96 and body surface temperature. FI score is continuous from 0-1, with higher values indicating  
97 worse frailty. A cutoff of 0.21 has been previously used in rodents<sup>38</sup> to stratify frailty as  
98 either high (frail:  $FI \geq 0.21$ ) or low (not frail:  $FI < 0.21$ ). But as mice reaches 30 months old,  
99 they all become frail with higher FI score ( $FI > 0.21$ ) in our study. Indeed, as shown in Fig. 2a  
100 and Fig. S1a, FI score significantly increased with chronological age from 21 to 30 months at  
101 the population level ( $P$ -value =  $4.8e-06$ , Wilcoxon signed-rank test). Hence, instead of using  
102 a fixed FI score cutoff, in this work we used the median value of FI change (denoted as  $\Delta FI$ )  
103 to delineate healthy versus normal aging. Specifically, we calculated  $\Delta FI$  between month 21  
104 and 30 for each mouse, and then we dichotomized those mice at month 30 into two groups  
105 based on the median value of their  $\Delta FI$ : ‘healthy aging’ (age in weeks: mean  $121.78 \pm$   
106 standard deviation  $3.88$ ;  $\Delta FI$ :  $0.088 \pm 0.038$ ; FI:  $0.342 \pm 0.048$ ; n=11); and ‘normal  
107 aging’ (age in weeks:  $121.42 \pm 4.07$ ;  $\Delta FI$ :  $0.179 \pm 0.034$ ; FI:  $0.398 \pm 0.055$ ; n=11).  
108 CR diet was associated with a lower level of  $\Delta FI$  at month 30 than AL diet (Fig. 2b,  $P$ -value  
109 =  $0.029$ , Wilcoxon–Mann–Whitney test). In particular, 87.5% (7/8) of mice with CR diet  
110 belonged to the healthy aging group compared to just 36.4% (4/11) of mice fed *ad libitum*.  
111 These results suggest that CR had a beneficial effect on aging, consistent with previous  
112 studies<sup>27</sup>.

113 We found that the body mass (BM) of mice generally decreased during aging (Fig. 2c,  
114  $P$ -value = 0.0011, Wilcoxon signed-rank test), which was contributed by healthy aging mice  
115 due to the fact that most of them (63.64%) were from the CR group (Fig. S1b). At 30 months  
116 of age, the BM of the healthy aging mice was significantly lower than the normal aging (Fig.  
117 2c,  $P$ -value = 0.028, Wilcoxon–Mann–Whitney test) and baseline mice (Fig. S1b,  $P$ -value =  
118 0.0049, Wilcoxon signed-rank test). To better understand this finding, we calculated delta  
119 change of BM ( $\Delta$ BM) between month 21 and 30 for each mouse. The  $\Delta$ FI was positively  
120 associated with  $\Delta$ BM (Fig. 2d,  $\rho$  = 0.3888, Spearman correlation), suggesting that a normal  
121 aging mouse (with large  $\Delta$ FI) is associated with an increasing level of BM. In addition, we  
122 found that the BM in healthy aging mice gradually decreased over time (Fig. S2a), especially  
123 in those mice with CR diet (Fig. S2b). Additionally, normal aging mice showed rapid loss of  
124 BM after some time points (Fig. S2). Using Kaplan–Meier survival analysis, the differences  
125 in cumulative survival rates were not statistically significant between healthy and normal  
126 aging mice (Fig. S3,  $P$ -value = 0.23, log-rank test). However, the healthy aging mice showed  
127 qualitatively longer lifespan ( $134.36 \pm 9.43$ ) than normal aging ( $131.06 \pm 7.53$ ) mice ( $P$ -value  
128 = 0.313, Wilcoxon–Mann–Whitney test), as some mice from the healthy aging group lived  
129 substantially longer.

130

### 131 **Aging-related changes in gut microbial community**

132 Using universal 16S qPCR, we first measured the total bacterial load (BL) in the stool  
133 samples (Fig. 2e and Fig S1c). The results showed the total BL detected in these healthy  
134 aging mice was higher than the BL present in the normal aging mice (Fig. 2e). For the  
135 changes of total BL over time ( $\Delta$ BL), we found  $\Delta$ FI was inversely associated with  $\Delta$ BL (Fig.  
136 2f,  $\rho$  = -0.2107, Spearman correlation), suggesting that a normal aging mouse (larger  $\Delta$ FI) is  
137 associated with a decreasing total BL.

138 We then measured the gut microbial community compositions of those stool samples  
139 using 16S rRNA gene sequencing (see Methods, Table S1). Phylum-level taxonomic profiles  
140 of the gut microbiome samples of those mice are shown in Fig. 3a. Consistent with previous  
141 studies<sup>39,40</sup>, we found that Bacteroidetes, Firmicutes and Verrucomicrobia were the most  
142 dominant phyla in the murine gut microbiota. Notable age-related compositional shifts  
143 included an enrichment in Firmicutes, and reduction in Bacteroidetes and Verrucomicrobia,  
144 although such trade-offs among dominant phyla are expected *a priori* in relative abundance  
145 data. Moreover, the Firmicutes/Bacteroidetes ratio of the gut microbiota increased with age  
146 (Fig. 3b,  $P$ -value = 0.0025, Wilcoxon signed-rank test). Both healthy aging and normal aging  
147 mice showed higher values for this ratio compared with baseline mice (Fig. S4a).

148 Using the Shannon diversity and Simpson index as alpha diversity measures, we found  
149 that alpha diversity increased with age (Fig. 3c,d and Fig. S4b,c), consistent with a previous  
150 mouse study<sup>41</sup>. Interestingly, we found that the Shannon diversity was only significantly  
151 higher in healthy aging mice compared to baseline mice (Fig. S4b,  $P$ -value = 0.019,

152 Wilcoxon signed-rank test). In addition, a clear separation (permutational multivariate  
153 analysis of variance (PERMANOVA) test,  $P$ -value = 0.0001, Bray-Curtis dissimilarity) could  
154 be seen between mice at 21 and 30 months of age in the principal coordinate analysis (PCoA)  
155 plot based on Bray-Curtis dissimilarity (Fig. 3e). Indeed, PERMANOVA test indicated  
156 significantly altered microbial compositions for both healthy aging ( $P$ -value = 0.0004) and  
157 normal ( $P$ -value = 0.0086) aging mice between baseline and 30 months of age (Fig. S4d).  
158 However, we found no significant difference between healthy aging and normal aging mice  
159 at both 21 ( $P$ -value = 0.8747) and 30 ( $P$ -value = 0.3536) months of age. Bray-Curtis  
160 dissimilarity was higher among individuals within normal aging mice compared to baseline  
161 mice (Fig. S4e,  $P$ -value =  $4e-08$ , Wilcoxon signed-rank test) or healthy aging mice (Fig. 3f,  
162  $P$ -value = 0.015, Wilcoxon–Mann–Whitney test). This suggests that normal aging is  
163 characterized by high variations in gut microbiota between individuals.

164

### 165 **The effect of aging on hematology and associations between gut microbiota and blood** 166 **markers**

167 Aging is associated with a decline in immune system function at multiple levels<sup>42</sup>. To explore  
168 aging-related immune system modifications, we measured hematological parameters over  
169 time (Table S2). We found that the mice at 30 months of age tended to have higher level  
170 (with  $P$  value  $<0.05$ ) of neutrophils percentage, neutrophil to lymphocyte ratio (NLR),  
171 monocytes percentage (MOp, % of leukocytes), red cell distribution width (RDW, %  
172 variation), and mean platelet volume (MPV, fL), but lower level (with  $P$  value  $<0.05$ ) of  
173 white blood cell (WBC, k/uL), lymphocytes (LY, k/uL), lymphocytes percentage (LYp, % of  
174 leukocytes), red blood cell (RBC, M/uL), hemoglobin (Hb, g/dL), Mean corpuscular volume  
175 (MCV, fL) and hematocrit (HCT, % volume) when compared with mice at 21 months of age.  
176 Specifically, higher NLR (an important biomarker of systemic inflammation<sup>43</sup>) levels on  
177 30-month-old mice were mainly observed in normal aging mice ( $P$  value = 0.016). Here  $P$   
178 values were all calculated from the Wilcoxon–Mann–Whitney test, adjusted with the  
179 Benjamini–Hochberg FDR method. These results confirm prior observations that high levels  
180 of inflammation are not an inevitable consequence of aging, but rather associated with  
181 normal or unhealthy aging. Moreover, at 30 months of age, we found that normal aging mice  
182 had significantly higher MPV but normal PLT.

183 Given the effects of aging process on hematology, we next used MaAsLin2 (multivariate  
184 analysis by linear models<sup>44</sup>) to evaluate the associations between microbial taxa and blood  
185 markers. These linear mixed models accounted for within-individual correlation from the  
186 study's repeated sampling design, as well as occasional missing observations at some time  
187 points. To control for potential confounding variables, we added four covariates into the  
188 model as fixed effects, including diet treatment, cohort, cage, and body mass. In addition,  
189 each mouse's identifier treated as random effect. A total of 24 ASVs (amplicon sequence  
190 variant) features were significantly associated with at least one blood marker (Fig. 4,  $q$ -value

191  $\leq 0.2$ , Table S3). In general, blood markers correlating most with microbial taxa included  
192 MCV, LY and NLR. For example, MCV was inversely associated with the abundance of  
193 ASV 3949 (*Anaerotruncus*,  $q$ -value =  $2.38e-14$ ) and ASV3729 (*Clostridium aldenense*,  
194  $q$ -value =  $1.52e-6$ ), and LY was positively associated with ASV890 (Ruminococcaceae,  
195  $q$ -value = 0.0004), ASV2868 (*Oscillibacter*,  $q$ -value = 0.015), and ASV2973 (*Intestinimonas*  
196 *butyriciproducens*,  $q$ -value = 0.035). NLR was positively associated with ASV5690  
197 (*Flavonifractor plautii*,  $q$ -value = 0.04) and ASV555 (*Acetatifactor muris*,  $q$ -value = 0.048),  
198 and negatively associated with ASV2878 (Lachnospiraceae,  $q$ -value = 0.028), ASV4558  
199 (Bacteroidales,  $q$ -value = 0.146), and ASV1970 (*Clostridium XIVa*,  $q$ -value = 0.189).

200

### 201 **Microbial taxa related to frailty index and healthy aging**

202 We next investigated the FI in relation to the microbial features using MaAsLin2 in which  
203 diet, cohort, cage, and body mass were included as fixed effects and each mouse's identifier  
204 was included as a random effect. We observed a set of 14 microbial features that were  
205 strongly linked to FI (Fig. 5,  $q$ -value  $\leq 0.2$ , Table S4). Consistent with previous reports that  
206 the abundance of the *Clostridium sensu stricto* genus increases with aging<sup>45-47</sup>, ASV3100  
207 (*Clostridium sensu stricto*:  $q$ -value = 0.021) was positively associated with the FI.  
208 *Clostridium XIVa*<sup>48</sup> (ASV2882,  $q$ -value = 0.048 and ASV1101:  $q$ -value = 0.112) and  
209 *Subdoligranulum variabile*<sup>49</sup> (ASV157,  $q$ -value = 0.153), known as important producers of  
210 butyrate, were found to be negatively associated with FI. We also found inverse associations  
211 of the FI with taxa such as ASV847 (*Phoceo massiliensis*,  $q$ -value = 0.069), ASV 1726  
212 (*Parabacteroides goldsteinii*,  $q$ -value = 0.083), and ASV1123 (*Enterorhabdus*,  $q$ -value =  
213 0.090). A previous study linked *Parabacteroides goldsteinii* with reduction of intestinal  
214 inflammation and enhancement of cellular mitochondrial and ribosomal activities in the  
215 colon<sup>50</sup>.

216 To examine potential gut microbial signatures of late-life aging, we performed  
217 differential abundance analysis using ANCOM<sup>51</sup> (analysis of composition of microbiomes).  
218 ANCOM identified multiple gut microbiota signature that were significantly different  
219 between baseline and 30 months of age in healthy aging (Fig. S5a and Table S5) and normal  
220 aging (Fig. S5b and Table S6) mice. Most of these features were also identified when  
221 comparing all mice between 21 and 30 months of age as a group (Fig. S6 and Table S7).  
222 Intriguingly, we found 7 ASVs that significantly and concordantly increased with age in both  
223 healthy aging and normal aging groups (Fig. S5), including ASV5550 (Lachnospiraceae),  
224 ASV5652 (Lachnospiraceae), ASV806 (Lachnospiraceae), ASV5435 (*Muribaculum*  
225 *intestinale*), ASV3224 (*Clostridium cocleatum*), ASV5628 (*Muribaculum intestinale*), and  
226 ASV3370 (*Muribaculum intestinale*), hinting at a universal murine microbial signature of  
227 aging. To assess how the microbial features links with healthy aging, we calculated the  
228 differential abundance of features between healthy aging and normal aging groups at both 21  
229 and 30 months of age (Fig. S7). Our data found 6 (Fig. S7a, Table S8) and 9 (Fig. S7b, Table

230 S9) ASVs were significantly associated with aging status at baseline and 30 months of ages,  
231 respectively. In particular, a set of microbial features were significantly enriched in healthy  
232 aging mice at 30 months of age, for example ASV648 (*Akkermansia muciniphila*), ASV73  
233 (*Ruminococcaceae*), and ASV2756 (*Acetatifactor muris*). *A. muciniphila* has been observed  
234 previously to prevent the age-related decline in thickness of the colonic mucus layer and  
235 attenuate inflammation in old age<sup>52</sup>. Here, this microbial feature was detected and shown to  
236 be positively associated with healthy aging. Normal aging mice showed increased ASV3370  
237 (*Muribaculum intestinale*), ASV3100 (*Clostridium sensu stricto*), ASV3939 (*Turicibacter*  
238 *sanguinis*), and ASV1123 (*Enterorhabdus*) compared with healthy aging mice. Consistent  
239 with positive relationship between FI and ASV3100 (*Clostridium sensu stricto*), we found  
240 that this feature was significantly higher in the normal aging group.

241

### 242 **Gut microbiota-based machine learning model to predict healthy aging**

243 As microbial compositions were associated with aging status, we sought to determine  
244 whether the microbial features observed in mid-life could predict healthy aging in later life.  
245 To achieve that, we employed an Elastic-net (ENET) logistic regression model to predict  
246 healthy aging. Specifically, the ENET model trained with ASVs (present in at least 10%  
247 samples) achieved an accuracy of 0.5 (11/22) with leave-one-out cross-validation (LOOCV)  
248 (Fig. 6a). In principle, we can apply feature selection techniques to choose a subset of  
249 features from the dataset. However, to improve the biological meaning of the model, we then  
250 only selected the microbial features that significantly associated with FI. This approach  
251 included a microbial signature comprised of 14 ASVs (Fig. 6b) from the gut microbiota of  
252 21-month old mice that exhibited power in predicting the healthy aging status of 30-month  
253 old mice with a LOOCV accuracy of 0.773 (17/22) (Fig. 6a). Notably, we also observed that  
254 *Clostridium sensu stricto* and *Enterorhabdus* were significantly overrepresented in normal  
255 aging mice at 30 months of age. A previous study found that *Clostridium sensu stricto* was  
256 significantly enriched in early onset necrotizing enterocolitis subjects<sup>53</sup>. *Enterorhabdus*, a  
257 member of the family Coriobacteriaceae, has been isolated from a mouse model of  
258 spontaneous colitis<sup>54</sup>. These findings were consistent with higher level of NLR in normal  
259 aging mice, which was used as a marker of systemic inflammation. This may partially  
260 explain the ability of these features to predict healthy aging over the subsequent 9 months.  
261 Finally, we validated our model by generating a null model with randomly selected features  
262 (number of features=14, times=100), which yielded a mean LOOCV accuracy of 0.443 (Fig.  
263 6a).

264

### 265 **Discussion**

266 Over the last few decades, global average life expectancy has increased dramatically,  
267 resulting in a proportionately larger aging population. Currently, chronological age is the

268 most widely used indicator of aging, yet it provides limited information on the quality of life  
269 during the aging process. Understanding how to promote healthy aging will be key to  
270 increasing healthspan. Evidence is emerging that the gut microbiota is intrinsically linked  
271 with energy metabolism and the aging process<sup>55-58</sup>. In this study, we observed that the mouse  
272 gut microbiota is associated with healthy aging on late-life aged mice. And we identified a  
273 specific stool-microbiota-derived signature of aging that yielded a reasonable accuracy for  
274 the prediction of healthy aging.

275 A better predictor of mortality and morbidity in humans than chronological age is the  
276 Frailty index (FI)<sup>61</sup>. The FI has been reverse translated into a tool for mice which includes 31  
277 non-invasive parameters across a range of systems<sup>37,62</sup>. Previous studies applied 0.21 as a  
278 cut-off point of FI to stratify between high frailty ( $\geq 0.21$ ) or low frailty ( $< 0.21$ )<sup>38,63,64</sup>. Given  
279 this specific threshold provides limited insight into the aging process, we instead employed  
280 the  $\Delta$ FI (FI changes between 30 and 21 months of age) to quantify the ability to maintain  
281 health conditions during aging. Indeed, those mice with higher  $\Delta$ FI (based on median value)  
282 were more vulnerable and frail. In our study, we only included the mice with basic  
283 measurements and biological samples at both 21 and 30 months, resulting 22 male mice that  
284 were fed either AL (n=14) or CR (n=8) diets. To avoid the issue arising from imbalanced  
285 sample size, we stratified the mice to healthy and normal aging mice based on the  $\Delta$ FI. As  
286 expected, 87.5% (7/8) of mice with CR diet belonged to the healthy aging group compared to  
287 just 36.4% (4/11) of mice fed AL.

288 Although several previous studies demonstrated the links between gut microbiota and  
289 aging in mice, these studies mainly focused on the comparison between different growth  
290 stages<sup>65-67</sup>. In this study, we examined the gut microbiota collected at 21 and 30 months of  
291 age from 22 mice and measured the aging status. Concordant with previous reports, we found  
292 that aging was associated with increased alpha diversity<sup>67</sup>. In particular, only healthy aging  
293 mice showed significantly increased Shannon diversity with age. Consistent with previous  
294 work<sup>68</sup>, our study also linked aging to an increase in interindividual variation in gut microbial  
295 community composition, with interindividual variation being especially high in the normal  
296 aging group. This suggested that the unhealthy aging related changes in the gut microbiota  
297 are likely stochastic, leading to community instability. Our study also linked FI to several  
298 microbial features such as ASVs from *Clostridium sensu stricto*, *Clostridium XIVa*,  
299 *Enterorhabdus*, and *Phoceia massiliensis*. Importantly, we constructed a machine learning  
300 model that can predict healthy aging with LOOCV accuracy of 0.773 (17/22) based on these  
301 FI related microbial features. And these microbial features may be further driven by CR after  
302 21 months of age. Indeed, we found that some predictive features (e.g., ASVs from  
303 *Clostridium sensu stricto* and *Enterorhabdus*) were only identified as differentially abundant  
304 taxa at 30 months of age. These findings suggest that key microbial taxa could potentially  
305 serve as biomarkers of aging and might contribute to the pathophysiology of aging, although  
306 the latter possibility remains to be determined.



307 We acknowledge the following limitations of this study. First, the sample size of the  
308 experimental cohort is relatively small and limited to male mice. Second, 16S rRNA gene  
309 sequencing limits our ability to establish associations at the strain level, suggesting that future  
310 studies with shotgun metagenomics sequencing will increase resolution. Third, the  
311 association between healthy aging and microbial taxa identified in this study does not  
312 demonstrate causality. Thus, additional research is needed to validate the mechanism behind  
313 these essential findings. Finally, the generalization of the machine learning-based gut  
314 microbial signature of aging to other murine cohorts and to humans remains unknown.  
315 However, the strengths of the study include a prospective study design, detailed phenotyping  
316 of mice, and assessment of accuracy using gut microbial features to predict healthy aging by  
317 machine learning model.

318 In conclusion, we evaluated the impact of age-related changes in gut microbiota on the  
319 course of aging in late-life male mice to assess a microbiota signature associated with healthy  
320 aging. Our study suggests the possible interaction between specific gut microbiota and aging  
321 status, and motivates future work that could establish causality and the potential of future  
322 microbiota-targeted interventions to increase healthy aging.

323

## 324 **Methods**

### 325 **Study population and sample collection**

326 In our study, we only included the mice with basic measurements and biological samples at  
327 both 21 and 30 months, resulting 22 C57BL/6 male mice (NIA Aging Colony). Following  
328 baseline measurements (body mass, food intake, frailty index and fecal collection), we  
329 randomly divided these mice into two diet groups, fed either *ad libitum* (AL, n=14) with  
330 standard chow or under mild (15%) calorie restriction (CR, n=8) and followed longitudinally  
331 until death. Mice were fed a standard chow based upon AIN-93G (Custom diet #A17101101,  
332 Research Diets, New Brunswick, NJ). CR was initiated over a period of two-weeks in a  
333 step-down fashion (10% CR, 15% CR) to ensure no loss on mice as they transition to the  
334 restricted feeding paradigm. Fecal samples (non-fasted) were collected in the morning  
335 (8.30am-11.30am) into sterile tubes and frozen at -80 °C until future analysis.

336

### 337 **The measurement of frailty index**

338 Frailty was measured using the validated 31-parameter mouse clinical frailty index as  
339 described previously<sup>36,37</sup>. Briefly, the clinical assessment includes evaluation of the  
340 integument, the musculoskeletal system, the vestibulocochlear/auditory systems, ocular and  
341 nasal systems, digestive system, urogenital system, respiratory system, signs of discomfort,  
342 body mass, and body surface temperature. FI score is continuous from 0-1, with higher values  
343 indicating worse frailty<sup>37</sup>.

344

345 **Hematology analysis**

346 25 $\mu$ L of whole blood obtained via submandibular bleeding was combined with 1 $\mu$ L of EDTA  
347 to prevent clotting. The sample was analyzed using a Hemavet 950 veterinary (Drew  
348 Scientific, Miami Lakes, FL) multi-species hematology system using standard settings.

349

350 **Estimation of bacterial load by quantitative PCR**

351 To estimate gut bacterial load in our 44 fecal samples, we performed quantitative PCR (qPCR)  
352 targeting the 16S rRNA gene using the same primers employed for 16S rRNA gene  
353 sequencing (515F and 806R). Briefly, 2  $\mu$ l of template DNA was combined with 12.5  $\mu$ l  
354 PerfeCTa SYBR Green SuperMix Reaction Mix (QuantaBio, Beverly, MA), 6  $\mu$ l  
355 nuclease-free H<sub>2</sub>O, and 2.25  $\mu$ l of each primer. Amplification was performed on a Bio-Rad  
356 CFX384 Touch (Bio-Rad, Hercules, CA) in the Bauer Core Facility at Harvard University  
357 using the following cycle settings: 95  $^{\circ}$ C for 10 min, followed by 40 cycles of 95  $^{\circ}$ C for  
358 15 s, 60  $^{\circ}$ C for 40 s and 72  $^{\circ}$ C for 30 s. Reactions were performed in triplicate with the  
359 mean value used in statistical analyses. Cycle-threshold values were standardized against a  
360 dilution curve of *Escherichia coli* genomic DNA at the following concentrations (ng/ $\mu$ L):  
361 100, 50, 25, 10, 5, 1, 0.5, plus a no-template (negative) control. Bacterial DNA  
362 concentrations were normalized to 16S copies/ $\mu$ L, then multiplied by the total extracted DNA  
363 volume (50  $\mu$ L) and divided by the grams of fecal matter utilized in the extraction of template  
364 DNA (varied), allowing us to report gut bacterial load as 16S rRNA gene copies per gram of  
365 feces.

366

367 **DNA isolation and 16S rRNA gene sequencing**

368 Gut microbial DNA was isolated using the DNeasy PowerSoil Pro Kit (Qiagen) and  
369 PCR-amplified using barcoded primers targeting the V4 region of the bacterial 16S rRNA  
370 gene [515F (GTGYCAGCMGCCGCGGTAA) and 806R  
371 (GGACTACNVGGGTWTCTAAT); Integrated DNA Technologies]. The following  
372 thermocycler protocol was used: 94 $^{\circ}$ C for 3 min, 35 cycles of 94 $^{\circ}$ C for 45 s, 50 $^{\circ}$ C for 30 s,  
373 and 72 $^{\circ}$ C for 90 s, with a final extension at 72 $^{\circ}$ C for 10 min. Triplicate PCR reactions for  
374 each sample were pooled and amplification was confirmed by 1.5% gel electrophoresis. 16S  
375 rDNA amplicons were cleaned with AmpureXP beads (Agencourt) on a per-sample basis,  
376 then quantified using the Quant-iT Picogreen dsDNA Assay Kit (Invitrogen). Amplicons  
377 were pooled evenly by DNA content and sequenced on an Illumina HiSeq (1 x 150 bp) at the  
378 Bauer Core Facility at Harvard University, generating 234,631  $\pm$  110,737 (mean  $\pm$  SD)  
379 sequences per sample passing filter (range: 75,898 to 391,101) (Table S1).

380

381 **Microbiota composition by 16S rRNA gene amplicon analysis**

382 Raw sequencing data was processed and analyzed using Quantitative Insights into Microbial  
383 Ecology 2 (QIIME2) pipeline<sup>70</sup>. Single-end sequences were first demultiplexed using the  
384 barcode sequences. The sequencing reads were then quality filtered, denoised, and merged  
385 using DADA2<sup>71</sup> to generate the ASV feature table. For taxonomy classification, ASV feature  
386 sequences were aligned against SILVA reference database<sup>72</sup>. Additional species level

387 assignment to the NCBI RefSeq<sup>73</sup> 16S rRNA database supplemented by RDP<sup>74</sup> was  
388 accomplished using the *assignTaxonomy* and *addSpecies* functions of DADA2 R package.

389

### 390 **Statistical analysis**

391 Microbial alpha and beta diversity measures were calculated at the ASV level using the  
392 vegan package in R. Principal coordinates analysis (PCoA) plot was generated with  
393 Bray-Curtis dissimilarity. The difference in microbiome compositions by different groups  
394 were tested by the permutational multivariate analysis of variance (PERMANOVA) using the  
395 “adonis” function in the R’s vegan package. All PERMANOVA tests were performed with  
396 the 9999 permutations based on the Bray-Curtis dissimilarity. Differences between groups  
397 were analyzed using a Wilcoxon–Mann–Whitney test (unpaired) or Wilcoxon signed rank  
398 test (paired). The survival probability was computed by the Kaplan-Meier method.

399 MaAsLin2<sup>44</sup> (multivariate association with linear model) was used for adjustment of  
400 covariates when determining the significance of ASVs contributing to specific hematological  
401 variables and FI, while accounting for potentially confounding covariates. The linear mixed  
402 models included each mouse’s identifier as random effects and other potential confounders as  
403 fixed effects. To be qualified for downstream analyses, a ASV feature needed to be detected  
404 at least 10% of samples. The *P* values were then adjusted using the Benjamini–Hochberg  
405 FDR method. The microbial features with corrected  $q$ -value  $< 0.2$  were presented. For  
406 differential abundance analysis, we used ANCOM<sup>51</sup> (analysis of composition of  
407 microbiomes), with a Benjamini–Hochberg correction at 5% level of significance, and  
408 adjusted for cage, cohort, body mass, and diet. Only the ASVs presented at least 10% of  
409 samples were included. To develop a model capable of predicting healthy aging, we  
410 implemented Elastic-net (ENET) using R’s caret package. Custom machine learning process  
411 was conducted using microbial features at 21 months of age to predict aging status at 30  
412 months of age. We first trained our model with all of microbial features. To further improve  
413 the biological plausibility, we then only included the microbial features significantly  
414 associated with FI. A total of 14 ASVs were selected based on the  $q$  value ( $q < 0.2$ ) from  
415 the MaAsLin2 model. Leave-one-out cross-validation (LOOCV) was applied with the  
416 *trainControl* function. To further validate our model, a null model was generated with  
417 random selected feature (number of features=14, times=100). All statistical analyses were  
418 performed using R.

419

420 **Data availability.** Raw sequencing reads have been deposited in NCBI under accession  
421 number PRJNA739980.

422

423 **Acknowledgements.** We thank Lusheng Huang, Congying Chen, Xu-Wen Wang and  
424 Zheng Sun for helpful discussions.

425

426 **Funding.** Y.-Y.L. acknowledges grants from National Institutes of Health (R01AI141529,  
427 R01HD093761, RF1AG067744, UH3OD023268, U19AI095219 and U01HL089856). S.J.M.,  
428 J.R.M acknowledge support for this project from NIA (P01AG055369-01A1). R.N.C. and  
429 J.R.M. benefited from an Acceleration Award from the Harvard Chan School of Public  
430 Health. R.N.C. acknowledges related support from NIA/ORWH (R01AG049395). A.E.K is  
431 supported by an AFAR Irene Diamond postdoctoral award. D.A.S. is supported by the Paul F.  
432 Glenn Foundation for Medical Research and NIH grants R01DK100263 and R37AG028730.  
433

434 **Author contributions.** Y.-Y.L, R.N.C., F.G. and J.R.M. conceived and designed the  
435 project. S.J.M., M.R.M. and A.E.K. performed the mice experiments. E.M.V., K.S.C., and  
436 R.N.C. performed the 16S rRNA gene sequencing and universal 16S quantitative PCR. S.K.  
437 performed all the data analysis. S.K. and Y.-Y.L. wrote the manuscript. All authors analyzed  
438 the results and edited the manuscript.

439

440 **Declarations of interests.** D.A.S. is a founder, equity owner, advisor to, director of,  
441 board member of, consultant to, investor in and/or inventor on patents licensed to Cohbar,  
442 Alterity, Galilei, EMD Millipore, Zymo Research, Immetas, and EdenRoc Sciences (and  
443 affiliates Arc-Bio, Dovetail Genomics, Claret Bioscience, MetroBiotech, and Liberty  
444 Biosecurity), Life Biosciences and Iduna. D.A.S. is an inventor on a patent application filed  
445 by Mayo Clinic and Harvard Medical School that has been licensed to Elysium Health. More  
446 information at <https://genetics.med.harvard.edu/sinclair-test/people/sinclair-other.php>. The  
447 other authors declare no competing interests.

448

## 449 **References**

- 450 1 Shetty, P. Grey matter: ageing in developing countries. *Lancet* **379**, 1285-1287,  
451 doi:10.1016/s0140-6736(12)60541-8 (2012).
- 452 2 Hansen, M. & Kennedy, B. K. Does Longer Lifespan Mean Longer Healthspan?  
453 *Trends Cell Biol* **26**, 565-568, doi:10.1016/j.tcb.2016.05.002 (2016).
- 454 3 Guinane, C. M. & Cotter, P. D. Role of the gut microbiota in health and chronic  
455 gastrointestinal disease: understanding a hidden metabolic organ. *Therap Adv*  
456 *Gastroenterol* **6**, 295-308, doi:10.1177/1756283X13482996 (2013).
- 457 4 Shreiner, A. B., Kao, J. Y. & Young, V. B. The gut microbiome in health and in  
458 disease. *Curr Opin Gastroenterol* **31**, 69-75, doi:10.1097/MOG.000000000000139

- 459 (2015).
- 460 5 Marchesi, J. R. *et al.* The gut microbiota and host health: a new clinical frontier. *Gut*  
461 **65**, 330-339, doi:10.1136/gutjnl-2015-309990 (2016).
- 462 6 Evans, J. M., Morris, L. S. & Marchesi, J. R. The gut microbiome: the role of a virtual  
463 organ in the endocrinology of the host. *J Endocrinol* **218**, R37-47,  
464 doi:10.1530/JOE-13-0131 (2013).
- 465 7 Rothschild, D. *et al.* Environment dominates over host genetics in shaping human gut  
466 microbiota. *Nature* **555**, 210-215, doi:10.1038/nature25973 (2018).
- 467 8 Bokulich, N. A. *et al.* Antibiotics, birth mode, and diet shape microbiome maturation  
468 during early life. *Sci Transl Med* **8**, 343ra382, doi:10.1126/scitranslmed.aad7121  
469 (2016).
- 470 9 Kenyon, C. J. The genetics of ageing. *Nature* **464**, 504-512, doi:10.1038/nature08980  
471 (2010).
- 472 10 Lopez-Otin, C., Blasco, M. A., Partridge, L., Serrano, M. & Kroemer, G. The  
473 hallmarks of aging. *Cell* **153**, 1194-1217, doi:10.1016/j.cell.2013.05.039 (2013).
- 474 11 Rang, C. U., Peng, A. Y. & Chao, L. Temporal dynamics of bacterial aging and  
475 rejuvenation. *Curr Biol* **21**, 1813-1816, doi:10.1016/j.cub.2011.09.018 (2011).
- 476 12 Hopkins, M. J., Sharp, R. & Macfarlane, G. T. Age and disease related changes in  
477 intestinal bacterial populations assessed by cell culture, 16S rRNA abundance, and  
478 community cellular fatty acid profiles. *Gut* **48**, 198-205, doi:10.1136/gut.48.2.198  
479 (2001).
- 480 13 Yatsunencko, T. *et al.* Human gut microbiome viewed across age and geography.  
481 *Nature* **486**, 222-227, doi:10.1038/nature11053 (2012).
- 482 14 Odamaki, T. *et al.* Age-related changes in gut microbiota composition from newborn  
483 to centenarian: a cross-sectional study. *BMC Microbiol* **16**, 90,  
484 doi:10.1186/s12866-016-0708-5 (2016).
- 485 15 Stewart, C. J. *et al.* Temporal development of the gut microbiome in early childhood  
486 from the TEDDY study. *Nature* **562**, 583-588, doi:10.1038/s41586-018-0617-x  
487 (2018).
- 488 16 Lan, Y., Kriete, A. & Rosen, G. L. Selecting age-related functional characteristics in  
489 the human gut microbiome. *Microbiome* **1**, 2, doi:10.1186/2049-2618-1-2 (2013).
- 490 17 Ni, J., Wu, G. D., Albenberg, L. & Tomov, V. T. Gut microbiota and IBD: causation or  
491 correlation? *Nat Rev Gastroenterol Hepatol* **14**, 573-584,  
492 doi:10.1038/nrgastro.2017.88 (2017).
- 493 18 Pittayanon, R. *et al.* Gut Microbiota in Patients With Irritable Bowel Syndrome-A  
494 Systematic Review. *Gastroenterology* **157**, 97-108, doi:10.1053/j.gastro.2019.03.049  
495 (2019).
- 496 19 Gurung, M. *et al.* Role of gut microbiota in type 2 diabetes pathophysiology.  
497 *EBioMedicine* **51**, 102590, doi:10.1016/j.ebiom.2019.11.051 (2020).
- 498 20 Zhao, L. The gut microbiota and obesity: from correlation to causality. *Nat Rev*  
499 *Microbiol* **11**, 639-647, doi:10.1038/nrmicro3089 (2013).
- 500 21 Kazemian, N., Mahmoudi, M., Halperin, F., Wu, J. C. & Pakpour, S. Gut microbiota  
501 and cardiovascular disease: opportunities and challenges. *Microbiome* **8**, 36,  
502 doi:10.1186/s40168-020-00821-0 (2020).

- 503 22 Morais, L. H., Schreiber, H. L. t. & Mazmanian, S. K. The gut microbiota-brain axis  
504 in behaviour and brain disorders. *Nat Rev Microbiol*,  
505 doi:10.1038/s41579-020-00460-0 (2020).
- 506 23 Claesson, M. J. *et al.* Composition, variability, and temporal stability of the intestinal  
507 microbiota of the elderly. *Proc Natl Acad Sci U S A* **108 Suppl 1**, 4586-4591,  
508 doi:10.1073/pnas.1000097107 (2011).
- 509 24 Claesson, M. J. *et al.* Gut microbiota composition correlates with diet and health in  
510 the elderly. *Nature* **488**, 178-184, doi:10.1038/nature11319 (2012).
- 511 25 Kundu, P., Blacher, E., Elinav, E. & Pettersson, S. Our Gut Microbiome: The  
512 Evolving Inner Self. *Cell* **171**, 1481-1493, doi:10.1016/j.cell.2017.11.024 (2017).
- 513 26 Bartke, A. *et al.* Extending the lifespan of long-lived mice. *Nature* **414**, 412,  
514 doi:10.1038/35106646 (2001).
- 515 27 Heilbronn, L. K. & Ravussin, E. Calorie restriction and aging: review of the literature  
516 and implications for studies in humans. *Am J Clin Nutr* **78**, 361-369,  
517 doi:10.1093/ajcn/78.3.361 (2003).
- 518 28 Flanagan, E. W., Most, J., Mey, J. T. & Redman, L. M. Calorie Restriction and Aging  
519 in Humans. *Annu Rev Nutr* **40**, 105-133, doi:10.1146/annurev-nutr-122319-034601  
520 (2020).
- 521 29 Fontana, L. & Partridge, L. Promoting health and longevity through diet: from model  
522 organisms to humans. *Cell* **161**, 106-118, doi:10.1016/j.cell.2015.02.020 (2015).
- 523 30 Zou, H. *et al.* Effect of Caloric Restriction on BMI, Gut Microbiota, and Blood  
524 Amino Acid Levels in Non-Obese Adults. *Nutrients* **12**, doi:10.3390/nu12030631  
525 (2020).
- 526 31 Ruiz, A. *et al.* One-year calorie restriction impacts gut microbial composition but not  
527 its metabolic performance in obese adolescents. *Environ Microbiol* **19**, 1536-1551,  
528 doi:10.1111/1462-2920.13713 (2017).
- 529 32 Zhang, C. *et al.* Structural modulation of gut microbiota in life-long calorie-restricted  
530 mice. *Nat Commun* **4**, 2163, doi:10.1038/ncomms3163 (2013).
- 531 33 Fraumene, C. *et al.* Caloric restriction promotes rapid expansion and long-lasting  
532 increase of Lactobacillus in the rat fecal microbiota. *Gut Microbes* **9**, 104-114,  
533 doi:10.1080/19490976.2017.1371894 (2018).
- 534 34 Tanca, A. *et al.* Caloric restriction promotes functional changes involving short-chain  
535 fatty acid biosynthesis in the rat gut microbiota. *Sci Rep* **8**, 14778,  
536 doi:10.1038/s41598-018-33100-y (2018).
- 537 35 Benraad, C. E. M. *et al.* Frailty as a predictor of mortality in older adults within 5  
538 years of psychiatric admission. *Int J Geriatr Psychiatry* **35**, 617-625,  
539 doi:10.1002/gps.5278 (2020).
- 540 36 Kane, A. E. *et al.* Impact of Longevity Interventions on a Validated Mouse Clinical  
541 Frailty Index. *J Gerontol A Biol Sci Med Sci* **71**, 333-339, doi:10.1093/gerona/glu315  
542 (2016).
- 543 37 Whitehead, J. C. *et al.* A clinical frailty index in aging mice: comparisons with frailty  
544 index data in humans. *J Gerontol A Biol Sci Med Sci* **69**, 621-632,  
545 doi:10.1093/gerona/glt136 (2014).
- 546 38 Kane, A. E. *et al.* Sex Differences in Healthspan Predict Lifespan in the 3xTg-AD

- 547 Mouse Model of Alzheimer's Disease. *Front Aging Neurosci* **10**, 172,  
548 doi:10.3389/fnagi.2018.00172 (2018).
- 549 39 Zhao, M. *et al.* Modulation of the Gut Microbiota during High-Dose Glycerol  
550 Monolaurate-Mediated Amelioration of Obesity in Mice Fed a High-Fat Diet. *mBio*  
551 **11**, doi:10.1128/mBio.00190-20 (2020).
- 552 40 Jenkins, T. P. *et al.* Schistosoma mansoni infection is associated with quantitative and  
553 qualitative modifications of the mammalian intestinal microbiota. *Sci Rep* **8**, 12072,  
554 doi:10.1038/s41598-018-30412-x (2018).
- 555 41 Hoffman, J. D. *et al.* Age Drives Distortion of Brain Metabolic, Vascular and  
556 Cognitive Functions, and the Gut Microbiome. *Front Aging Neurosci* **9**, 298,  
557 doi:10.3389/fnagi.2017.00298 (2017).
- 558 42 Montecino-Rodriguez, E., Berent-Maoz, B. & Dorshkind, K. Causes, consequences,  
559 and reversal of immune system aging. *J Clin Invest* **123**, 958-965,  
560 doi:10.1172/JCI64096 (2013).
- 561 43 Barker, T., Fulde, G., Moulton, B., Nadauld, L. D. & Rhodes, T. An elevated  
562 neutrophil-to-lymphocyte ratio associates with weight loss and cachexia in cancer. *Sci*  
563 *Rep* **10**, 7535, doi:10.1038/s41598-020-64282-z (2020).
- 564 44 Mallick, H. *et al.* Multivariable Association Discovery in Population-scale  
565 Meta-omics Studies. *bioRxiv* (2021).
- 566 45 Cox, L. M. *et al.* Calorie restriction slows age-related microbiota changes in an  
567 Alzheimer's disease model in female mice. *Sci Rep* **9**, 17904,  
568 doi:10.1038/s41598-019-54187-x (2019).
- 569 46 van der Lugt, B. *et al.* Integrative analysis of gut microbiota composition, host colonic  
570 gene expression and intraluminal metabolites in aging C57BL/6J mice. *Aging (Albany*  
571 *NY)* **10**, 930-950, doi:10.18632/aging.101439 (2018).
- 572 47 Drago, L., Toscano, M., Rodighiero, V., De Vecchi, E. & Mogna, G. Cultivable and  
573 pyrosequenced fecal microflora in centenarians and young subjects. *J Clin*  
574 *Gastroenterol* **46 Suppl**, S81-84, doi:10.1097/MCG.0b013e3182693982 (2012).
- 575 48 Van den Abbeele, P. *et al.* Butyrate-producing Clostridium cluster XIVa species  
576 specifically colonize mucins in an in vitro gut model. *ISME J* **7**, 949-961,  
577 doi:10.1038/ismej.2012.158 (2013).
- 578 49 Louis, P. & Flint, H. J. Diversity, metabolism and microbial ecology of  
579 butyrate-producing bacteria from the human large intestine. *FEMS Microbiol Lett* **294**,  
580 1-8, doi:10.1111/j.1574-6968.2009.01514.x (2009).
- 581 50 Lai, H. C. *et al.* Gut microbiota modulates COPD pathogenesis: role of  
582 anti-inflammatory Parabacteroides goldsteinii lipopolysaccharide. *Gut*,  
583 doi:10.1136/gutjnl-2020-322599 (2021).
- 584 51 Mandal, S. *et al.* Analysis of composition of microbiomes: a novel method for  
585 studying microbial composition. *Microb Ecol Health Dis* **26**, 27663,  
586 doi:10.3402/mehd.v26.27663 (2015).
- 587 52 van der Lugt, B. *et al.* Akkermansia muciniphila ameliorates the age-related decline in  
588 colonic mucus thickness and attenuates immune activation in accelerated aging Ercc1  
589 (-/Delta7) mice. *Immun Ageing* **16**, 6, doi:10.1186/s12979-019-0145-z (2019).
- 590 53 Zhou, Y. *et al.* Longitudinal analysis of the premature infant intestinal microbiome

- 591 prior to necrotizing enterocolitis: a case-control study. *PLoS One* **10**, e0118632,  
592 doi:10.1371/journal.pone.0118632 (2015).
- 593 54 Clavel, T. *et al.* Enterorhabdus caecimuris sp. nov., a member of the family  
594 Coriobacteriaceae isolated from a mouse model of spontaneous colitis, and emended  
595 description of the genus Enterorhabdus Clavel et al. 2009. *Int J Syst Evol Microbiol*  
596 **60**, 1527-1531, doi:10.1099/ijs.0.015016-0 (2010).
- 597 55 Zheng, X., Wang, S. & Jia, W. Calorie restriction and its impact on gut microbial  
598 composition and global metabolism. *Front Med* **12**, 634-644,  
599 doi:10.1007/s11684-018-0670-8 (2018).
- 600 56 Wang, S. *et al.* Gut microbiota mediates the anti-obesity effect of calorie restriction in  
601 mice. *Sci Rep* **8**, 13037, doi:10.1038/s41598-018-31353-1 (2018).
- 602 57 O'Toole, P. W. & Jeffery, I. B. Gut microbiota and aging. *Science* **350**, 1214-1215,  
603 doi:10.1126/science.aac8469 (2015).
- 604 58 Nagpal, R. *et al.* Gut microbiome and aging: Physiological and mechanistic insights.  
605 *Nutr Healthy Aging* **4**, 267-285, doi:10.3233/NHA-170030 (2018).
- 606 59 Michel, J. P. & Sadana, R. "Healthy Aging" Concepts and Measures. *J Am Med Dir*  
607 *Assoc* **18**, 460-464, doi:10.1016/j.jamda.2017.03.008 (2017).
- 608 60 Fallon, C. K. & Karlawish, J. Is the WHO Definition of Health Aging Well?  
609 Frameworks for "Health" After Three Score and Ten. *Am J Public Health* **109**,  
610 1104-1106, doi:10.2105/AJPH.2019.305177 (2019).
- 611 61 Clegg, A., Young, J., Iliffe, S., Rikkert, M. O. & Rockwood, K. Frailty in elderly  
612 people. *Lancet* **381**, 752-762, doi:10.1016/S0140-6736(12)62167-9 (2013).
- 613 62 Schultz, M. B. *et al.* Age and life expectancy clocks based on machine learning  
614 analysis of mouse frailty. *Nat Commun* **11**, 4618, doi:10.1038/s41467-020-18446-0  
615 (2020).
- 616 63 Rockwood, K., Song, X. & Mitnitski, A. Changes in relative fitness and frailty across  
617 the adult lifespan: evidence from the Canadian National Population Health Survey.  
618 *CMAJ* **183**, E487-494, doi:10.1503/cmaj.101271 (2011).
- 619 64 Blodgett, J., Theou, O., Kirkland, S., Andreou, P. & Rockwood, K. Frailty in  
620 NHANES: Comparing the frailty index and phenotype. *Arch Gerontol Geriatr* **60**,  
621 464-470, doi:10.1016/j.archger.2015.01.016 (2015).
- 622 65 Kurup, K. *et al.* Calorie restriction prevents age-related changes in the intestinal  
623 microbiota. *Aging (Albany NY)* **13**, 6298-6329, doi:10.18632/aging.202753 (2021).
- 624 66 Langille, M. G. *et al.* Microbial shifts in the aging mouse gut. *Microbiome* **2**, 50,  
625 doi:10.1186/s40168-014-0050-9 (2014).
- 626 67 Wu, C. S. *et al.* Age-dependent remodeling of gut microbiome and host serum  
627 metabolome in mice. *Aging (Albany NY)* **13**, 6330-6345, doi:10.18632/aging.202525  
628 (2021).
- 629 68 Wilmanski, T. *et al.* Gut microbiome pattern reflects healthy ageing and predicts  
630 survival in humans. *Nat Metab* **3**, 274-286, doi:10.1038/s42255-021-00348-0 (2021).
- 631 69 Carmody, R. N. *et al.* Cooking shapes the structure and function of the gut  
632 microbiome. *Nat Microbiol* **4**, 2052-2063, doi:10.1038/s41564-019-0569-4 (2019).
- 633 70 Bolyen, E. *et al.* Reproducible, interactive, scalable and extensible microbiome data  
634 science using QIIME 2. *Nat Biotechnol* **37**, 852-857, doi:10.1038/s41587-019-0209-9



- 635 (2019).  
636 71 Callahan, B. J. *et al.* DADA2: High-resolution sample inference from Illumina  
637 amplicon data. *Nat Methods* **13**, 581-583, doi:10.1038/nmeth.3869 (2016).  
638 72 Quast, C. *et al.* The SILVA ribosomal RNA gene database project: improved data  
639 processing and web-based tools. *Nucleic Acids Res* **41**, D590-596,  
640 doi:10.1093/nar/gks1219 (2013).  
641 73 Pruitt, K. D., Tatusova, T. & Maglott, D. R. NCBI reference sequences (RefSeq): a  
642 curated non-redundant sequence database of genomes, transcripts and proteins.  
643 *Nucleic Acids Res* **35**, D61-65, doi:10.1093/nar/gkl842 (2007).  
644 74 Cole, J. R. *et al.* Ribosomal Database Project: data and tools for high throughput  
645 rRNA analysis. *Nucleic Acids Res* **42**, D633-642, doi:10.1093/nar/gkt1244 (2014).

646

647

648

649

650

651

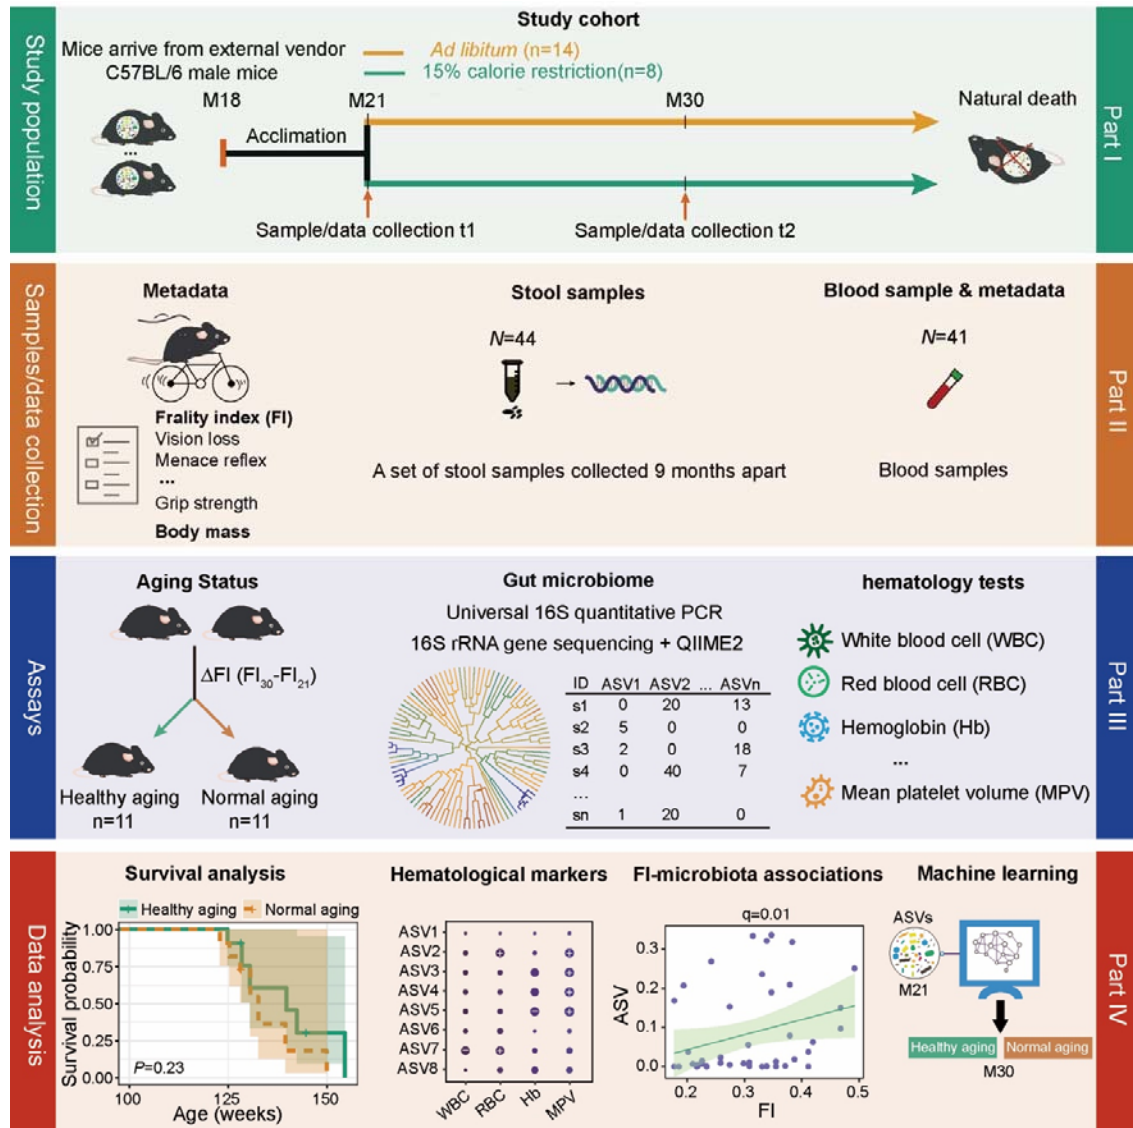

652

653 **Fig. 1. Schematic diagram showing the experimental design.** The study cohort was  
 654 comprised of 22 adult male C57BL/6 mice, which were recruited into the study at 21 months  
 655 of age after having been maintained since birth under standard husbandry conditions (see  
 656 Methods). We collected blood and fecal samples and measured frailty using a compound  
 657 index at 21 months (baseline) and 30 months of age. Following baseline measurements, we  
 658 randomly divided these mice into two diet groups, fed either *ad libitum* (AL, n=14) with  
 659 standard chow or under mild (15%) calorie restriction (CR, n=8). Mice were then followed  
 660 longitudinally until death. We performed universal 16S quantitative PCR (qPCR) to quantify  
 661 absolute bacterial abundance and used QIIME2 to obtain the ASV microbial features. Blood  
 662 markers were measured using standard methods. We then used the median FI change  
 663 (denoted as  $\Delta FI$ ) between 21 and 30 months of age to delineate healthy versus normal aging.  
 664

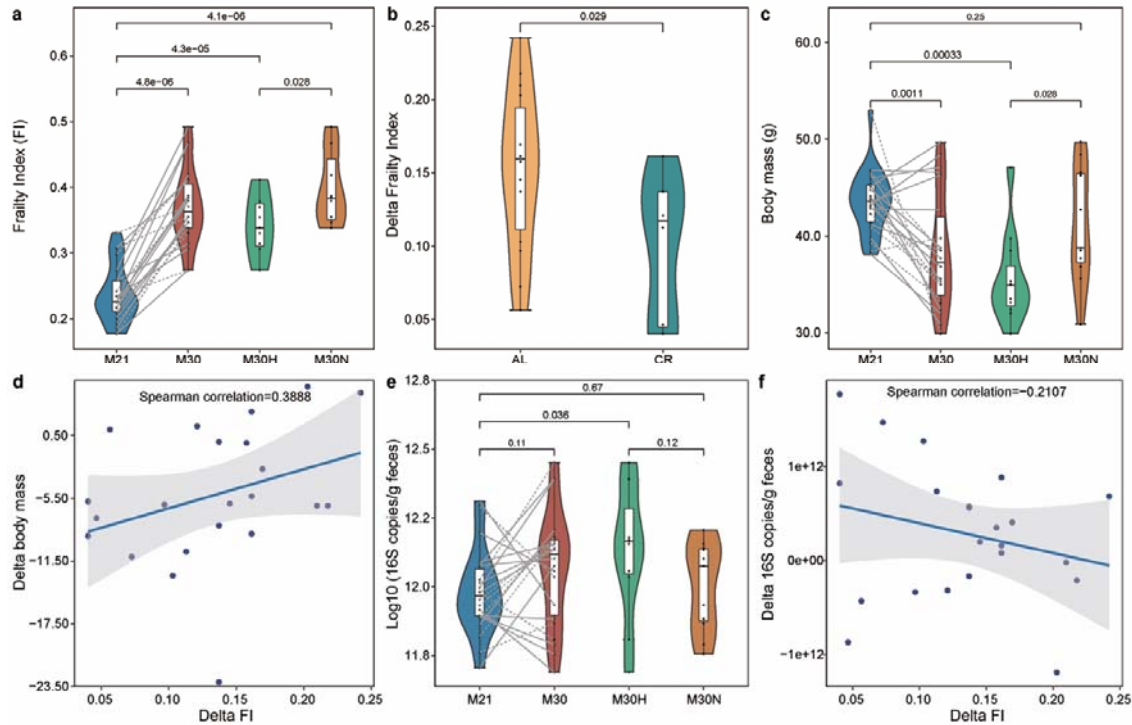

665

666 **Fig. 2. Frailty index associates with chronological age in mice.** **a**, Frailty index changes  
667 with age. Mice at 30 months of age were grouped into healthy and normal aging based on the  
668 median  $\Delta$ FI. **b**, The effect of caloric restriction on the  $\Delta$ FI between 21 and 30 months of age.  
669 **c**, Comparison of body mass (BM) for different groups. **d**, The association between  $\Delta$ FI and  
670  $\Delta$ BM in all mice. **e**, Comparison of total bacterial load for different groups. **f**, The association  
671 between  $\Delta$ FI and  $\Delta$ BL in all mice. Points obtained for the same subject from 21 and 30  
672 months of age are joined by solid (AL diet) and dotted (CR diet) lines. *P* value shown in **a-c**  
673 and **e** are the result of Wilcoxon–Mann–Whitney test (unpaired) and Wilcoxon signed rank  
674 test (paired). The correlation coefficient shown in **d** and **f** is the result of Spearman  
675 correlation. The lines show lm fit for the data, and shaded areas show 95% confidence  
676 intervals for the fit.

677

678

679

680

681

682

683

684

685

686

687

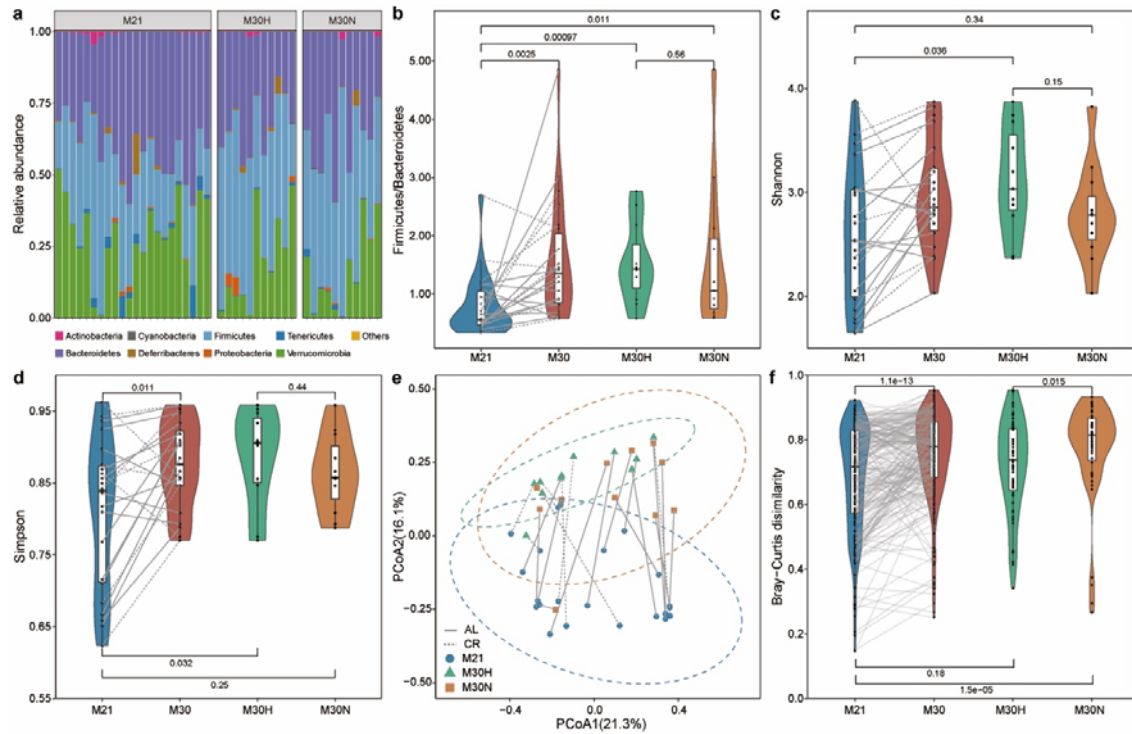

688

689 **Fig. 3. Impact of aging on gut microbial communities.** a, Relative abundance of bacterial  
690 phyla. b, The ratio of Firmicutes to Bacteroidetes. Alpha diversity using Shannon (c) and  
691 Simpson (d) index. e, Beta diversity using Principal Coordinate Analysis (PCoA) of  
692 Bray-Curtis dissimilarity. The dotted ellipse borders with color represent the 95% confidence  
693 interval. f, Boxplot of gut microbiota Bray-Curtis dissimilarity between subjects within each  
694 group. Points obtained for the same subject from 21 and 30 months of age in b-e are joined  
695 by solid (AL diet) and dotted (CR diet) lines. Points obtained for the same subject pairs from  
696 21 and 30 months of age in f are joined by solid line. P value shown in b-d, and f are the  
697 result of Wilcoxon-Mann-Whitney test (unpaired) and Wilcoxon signed rank test (paired).

698

699

700

701

702

703

704

705

706

707

708

709

710

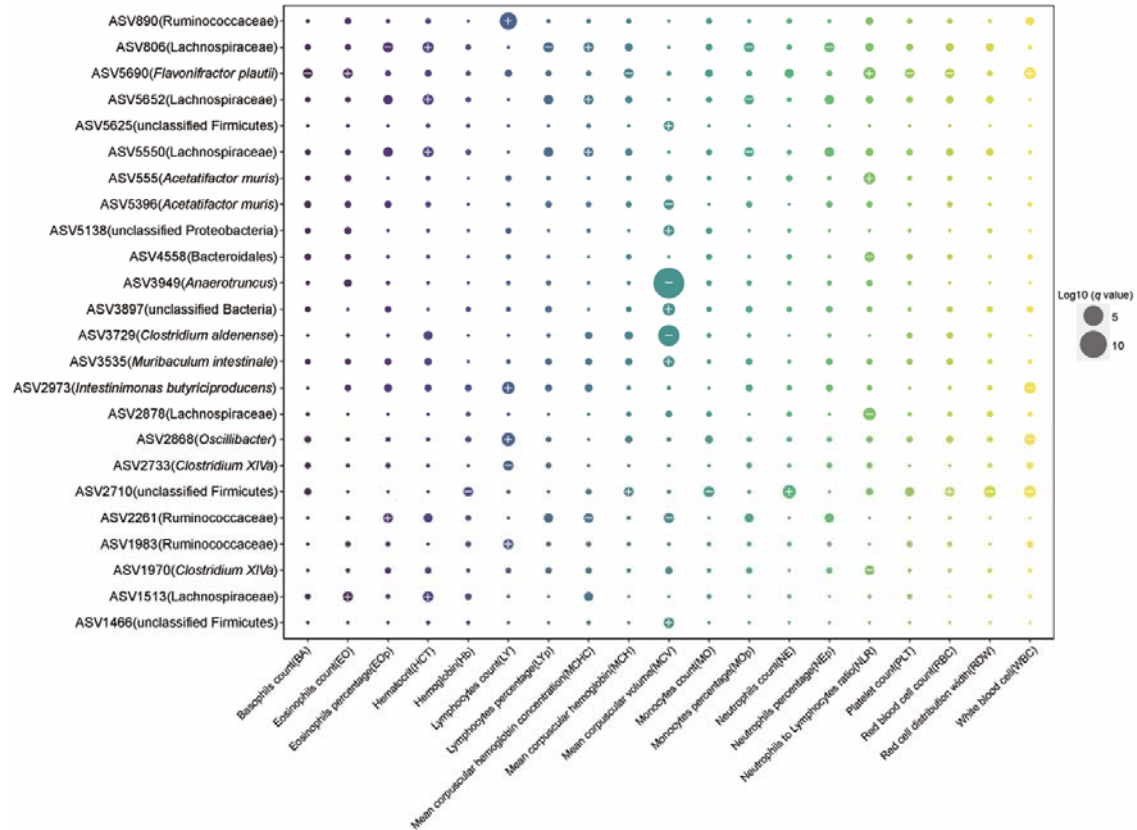

711

712 **Fig. 4. Identification of associations between blood cell and gut microbial features.** Dot  
 713 dot plot showing the links between the blood markers and gut microbial taxa identified using  
 714 MaAsLin2. The sizes of dots represent the  $q$  values from MaAsLin2. The greater the size, the  
 715 more significant the association. Symbols indicate the directions of associations in a given  
 716 model: plus, significant positive associations; minus, significant negative associations.  
 717 Threshold for FDR corrected  $q$ -value was set at 0.2. Linear mixed effects models were  
 718 applied to the association with subject set as random-effect.

719

720

721

722

723

724

725

726

727

728

729

730

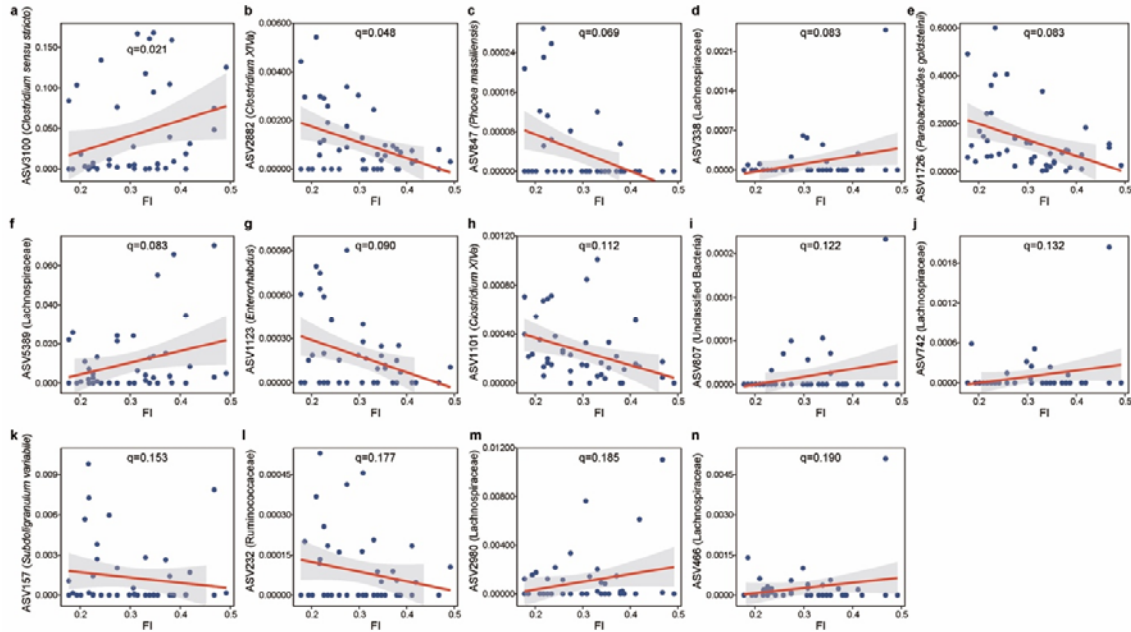

731

732 **Fig. 5. The significant associations between FI and gut microbial features. a,** ASV3100  
 733 (*Clostridium sensu stricto*). **b,** ASV2882 (*Clostridium XIVa*). **c,** ASV847 (*Phocaea*  
 734 *massiliensis*). **d,** ASV338 (Lachnospiraceae). **e,** ASV1726 (*Parabacteroides goldsteinii*). **f,**  
 735 ASV5389 (Lachnospiraceae). **g,** ASV1123 (*Enterorhabdus*). **h,** ASV1101(*Clostridium XIVa*).  
 736 **i,** ASV807 (Unclassified Bacteria). **j,** ASV742 (Lachnospiraceae). **k,** ASV157  
 737 (*Subdoligranulum variabile*). **l,** ASV232 (Ruminococcaceae). **m,** ASV2980  
 738 (Lachnospiraceae). **n,** ASV466 (Lachnospiraceae). Data shown are the relative abundance  
 739 versus FI for ASVs that were significantly associated with FI in MaAsLin2. Threshold for  
 740 FDR corrected  $q$ -value was set at 0.2. Linear mixed-effects models (LMMs) were applied to  
 741 the association with subject set as random effect. The lines show lm fit for the data, and  
 742 shaded areas show 95% confidence intervals for the fit.

743

744

745

746

747

748

749

750

751

752

753

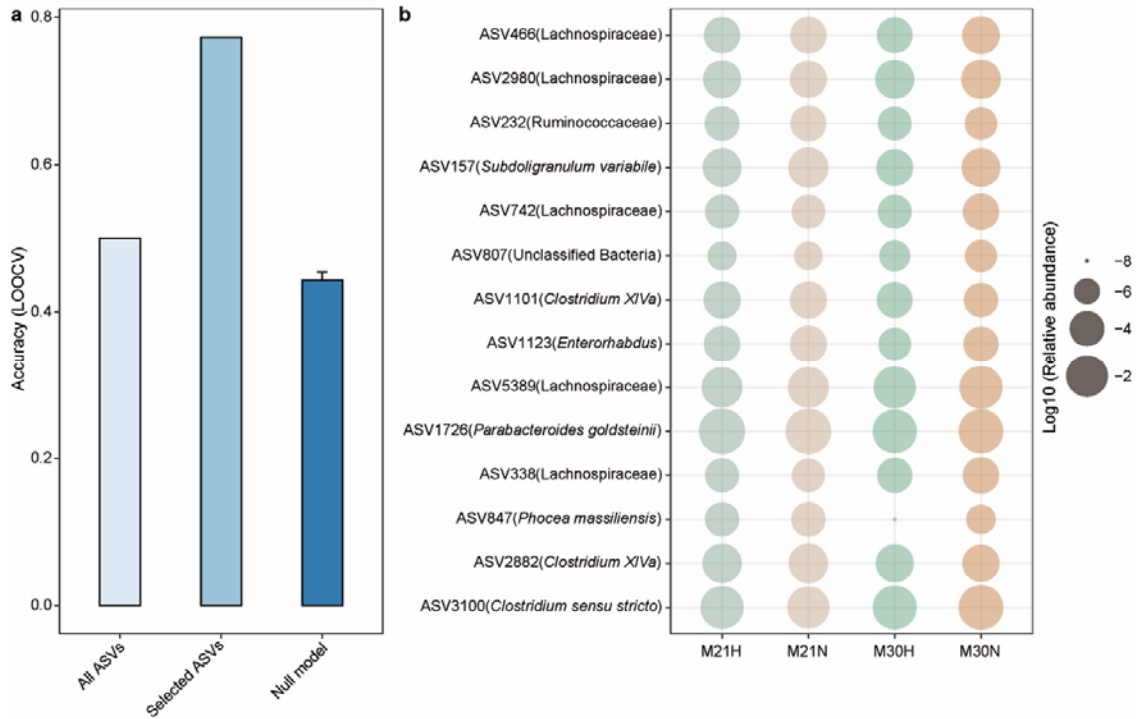

754

755 **Fig. 6. A gut microbiota-based signature moderately predicts healthy aging. a,**  
756 Leave-one-out (LOOCV) accuracy evaluating ability to predict healthy aging using  
757 Elastic-net (ENET). Each bar represents the performance based on different microbial feature  
758 combination: all ASVs, 14 FI-associated ASVs, and null model with 14 randomly selected  
759 features run 100 times. **b,** The mean relative abundance of 14 FI-related ASVs across  
760 different groups. The healthy aging status at 21 months of age was determined by the aging  
761 status at 30 months of age. Relative abundances are plotted on log<sub>10</sub> scale. Error bars  
762 represent the standard errors of the means (SEM) in null model.

763

764

765

766

767

768

769

770

771

772

773

774

775

776

777 **Supplementary information**

- 778 **Fig. S1 The effects of healthy aging on FI, body mass and total bacterial load.**  
779 **Fig. S2 The changes of body mass over time.**  
780 **Fig. S3 The survival probability was computed by the Kaplan-Meier method.**  
781 **Fig. S4 Impact of healthy aging on gut microbial communities.**  
782 **Fig. S5 Relative abundance of aging related microbial features in both normal and**  
783 **healthy aging mice.**  
784 **Fig. S6 Relative abundance of aging related microbial features.**  
785 **Fig. S7 Relative abundance of healthy aging related microbial features.**  
786 **Table S1 16S rRNA gene sequencing metadata.**  
787 **Table S2 The effect of aging process on blood cells in circulation.**  
788 **Table S3 The microbial features associated with blood markers identified by**  
789 **MaAsLin2.**  
790 **Table S4 The microbial features associated with Frailty index identified by MaAsLin2.**  
791 **Table S5 Differentially abundant taxa between 21 and 30 months of age in healthy aging**  
792 **mice detected by ANCOM, adjusted for cage, cohort and diet.**  
793 **Table S6 Differentially abundant taxa between 21 and 30 months of age in normal aging**  
794 **mice detected by ANCOM, adjusted for cage, cohort and diet.**  
795 **Table S7 Differentially abundant taxa between 21 and 30 months of age detected by**  
796 **ANCOM, adjusted for cage, cohort and diet.**  
797 **Table S8 Differentially abundant taxa between healthy and normal aging mice at 21**  
798 **months of age detected by ANCOM, adjusted for cage, cohort and diet.**  
799 **Table S9 Differentially abundant taxa between healthy and normal aging mice at 30**  
800 **months of age detected by ANCOM, adjusted for cage, cohort and diet.**

801

802

803

804

805

806

807

808

809



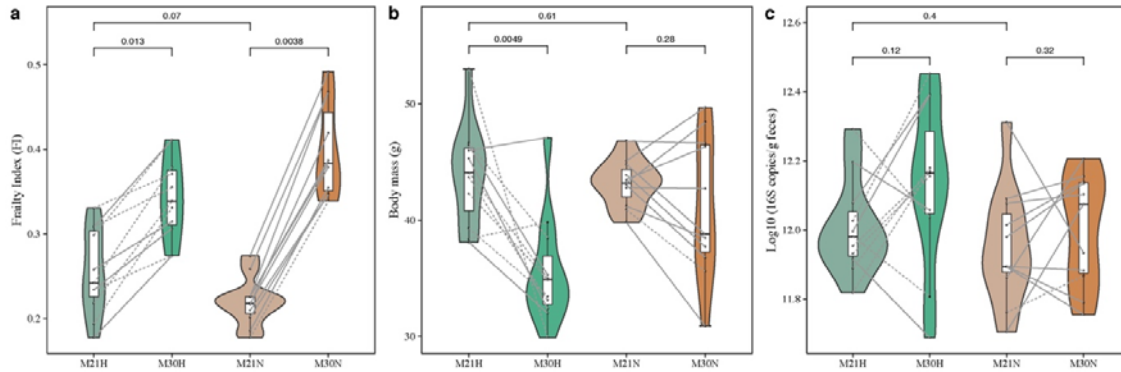

810

811 **Fig. S1. The effects of healthy aging on FI, body mass and total bacterial load.** a, Frailty  
812 index changes with age. Mice were grouped into healthy and normal aging based on the  
813 median  $\Delta$ FI at 30 months of age. b, Body mass changes with age. c, Total bacterial load  
814 changes with age. Points obtained for the same subject from 21 and 30 months of age are  
815 joined by solid (AL diet) and dotted (CR diet) lines. *P* value shown the results of  
816 Wilcoxon–Mann–Whitney test (unpaired) and Wilcoxon signed rank test (paired).

817

818

819

820

821

822

823

824

825

826

827

828

829

830

831

832

833

834

835

836

837

838

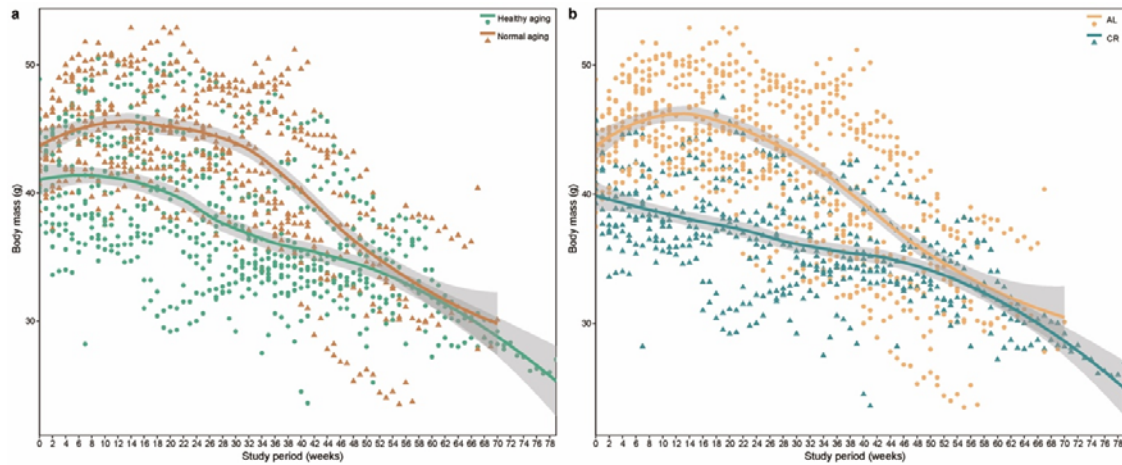

839

840

841

842

843

844

845

846

847

848

849

850

851

852

853

854

855

856

857

858

859

860

861

862

863

864

865

866

**Fig. S2. The changes of body mass over time.** a, Healthy aging versus Normal aging mice. b, AL diet versus CR diet. Curves show LOESS fit for the data per category, and shaded areas show 95% confidence intervals for the fit.

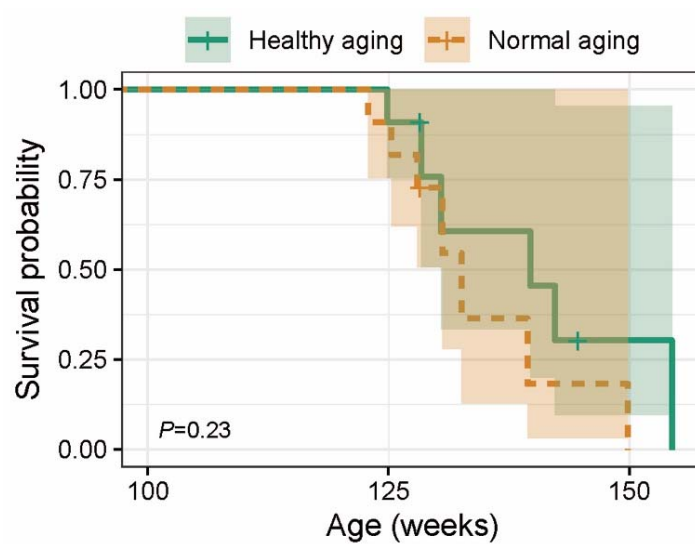

867

868 **Fig. S3. The survival probability was computed by the Kaplan-Meier method.  $P$  value is**  
869 **the result of log-rank test.**

870

871

872

873

874

875

876

877

878

879

880

881

882

883

884

885

886

887

888

889

890

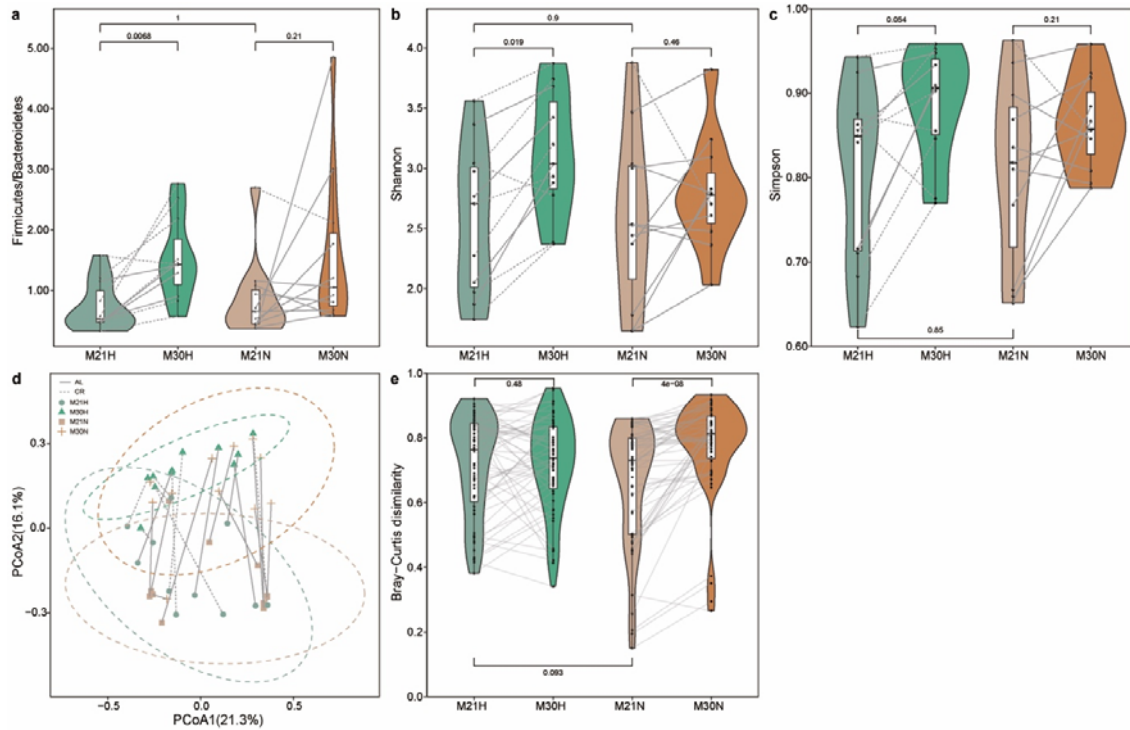

891

892 **Fig. S4. Impact of healthy aging on gut microbial communities.** **a**, The ratio of Firmicutes  
893 to Bacteroidetes. Alpha diversity using Shannon (**b**) and Simpson (**c**) index. **d**, Beta diversity  
894 using Principal Coordinate Analysis (PCoA) of Bray–Curtis dissimilarity. The dotted ellipse  
895 borders with color represent the 95% confidence interval. **e**, Boxplot of gut microbiome  
896 Bray–Curtis dissimilarity between subjects within each group. Mice were grouped into  
897 healthy and normal aging based on the median  $\Delta$ FI at 30 months of age. Points obtained for  
898 the same subject from 21 and 30 months of age in **a-d** are joined by solid (AL diet) and  
899 dotted (CR diet) lines. Points obtained for the same subject pairs from 21 and 30 months of  
900 age in **e** are joined by solid line. *P* value shown are the result of Wilcoxon–Mann–Whitney  
901 test (unpaired) and Wilcoxon signed rank test (paired).

902

903

904

905

906

907

908

909

910

911

912

913

914

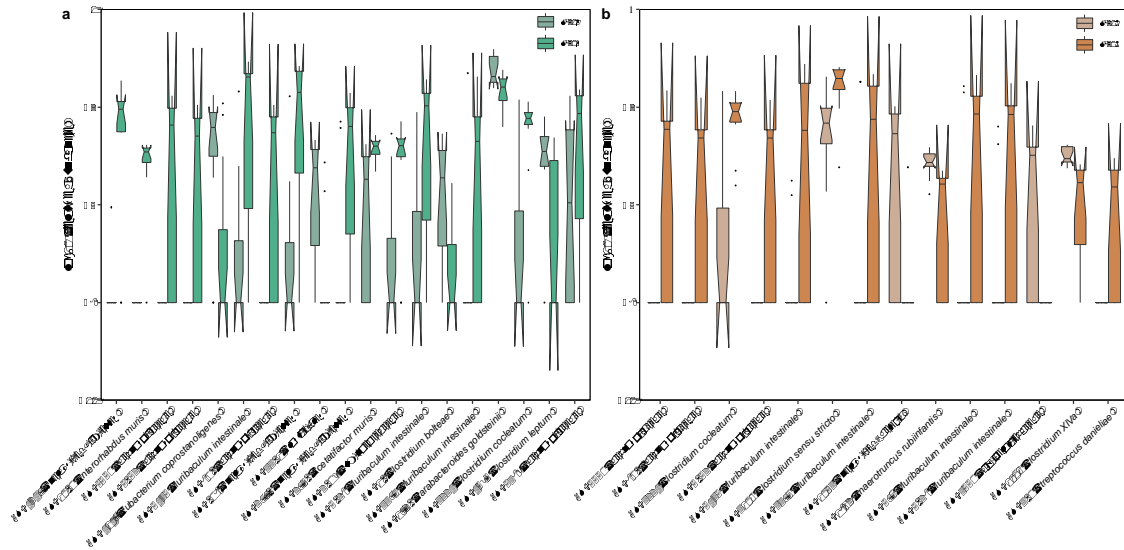

915

916 **Fig. S5. Relative abundance of aging related microbial features in both normal and**  
917 **healthy aging mice.** The differential abundant ASVs that differed significantly between 21  
918 and 30 months of age for healthy (a) and normal (b) aging mice identified by analysis of  
919 composition of microbiomes (ANCOM). The model was simultaneously adjusted for  
920 potential confounders including cage, cohort, diet, and body mass. Mice were grouped into  
921 healthy and normal aging based on the median  $\Delta$ FI at 30 months of age. The top  
922 differentially abundant taxa were ranked based on their W statistics (a high “w score”  
923 generated by this test indicates the greater likelihood that the null hypothesis can be rejected,  
924 indicating the number of times a parameter is significantly different between groups) (from  
925 left to right). The relative abundance (%) are plotted on log<sub>10</sub> scale. The notches in the  
926 boxplots show the 95% confidence interval around the median.

927

928

929

930

931

932

933

934

935

936

937

938

939

940

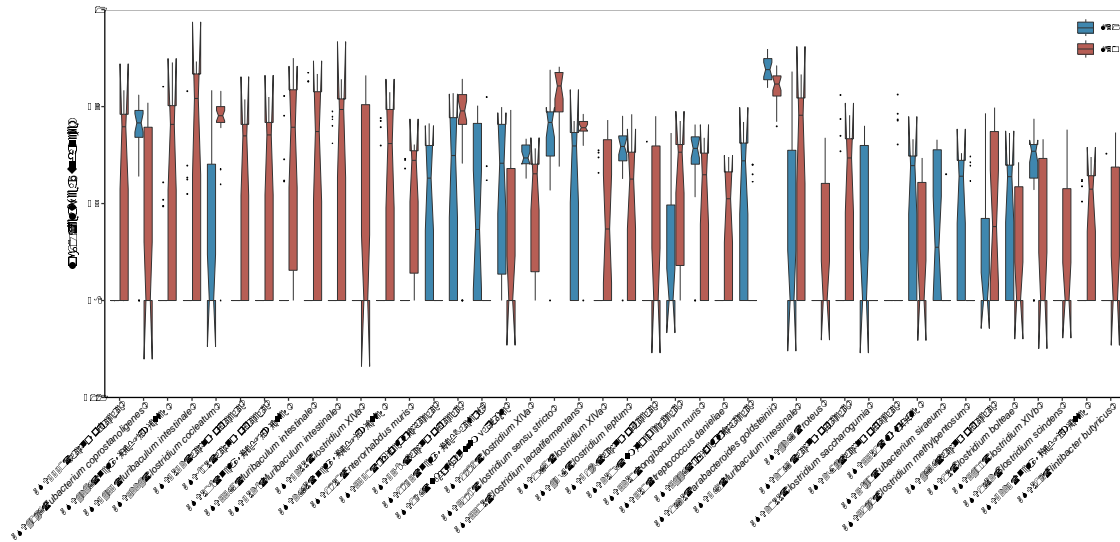

941  
942 **Fig. S6. Relative abundance of aging related microbial features.** The differential abundant  
943 ASVs that differed significantly between 21 and 30months of age identified by ANCOM.  
944 The model was simultaneously adjusted for potential confounders including cage, cohort, diet,  
945 and body mass. The top differentially abundant taxa were ranked based on their W statistics  
946 (a high “w score” generated by this test indicates the greater likelihood that the null  
947 hypothesis can be rejected, indicating the number of times a parameter is significantly  
948 different between groups) (from left to right). The relative abundance (%) are plotted on  
949 log10 scale. The notches in the boxplots show the 95% confidence interval around the  
950 median.

951  
952  
953  
954  
955  
956  
957  
958  
959  
960  
961  
962  
963  
964  
965  
966

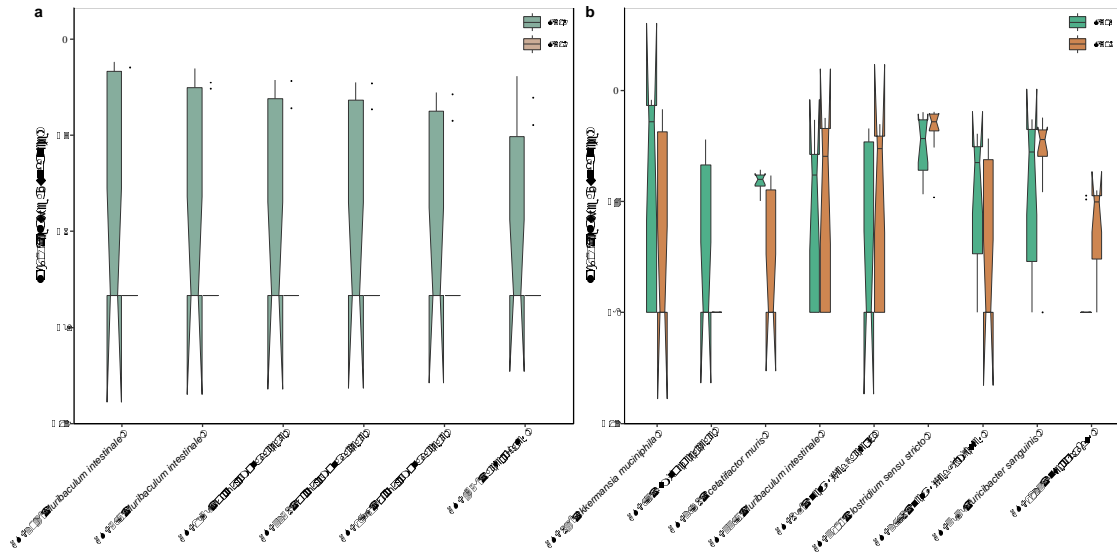

967

968 **Fig. S7 Relative abundance of healthy aging related microbial features.** The differential  
969 abundant ASVs that differed significantly between healthy and normal aging mice at 21 (a)  
970 and 30 (b) months of ages identified by ANCOM. The model was simultaneously adjusted  
971 for potential confounders including cage, cohort, diet, and body mass. Mice were grouped  
972 into healthy and normal aging based on the median  $\Delta$ FI at 30 months of age. The top  
973 differentially abundant taxa were ranked based on their W statistics (a high “w score”  
974 generated by this test indicates the greater likelihood that the null hypothesis can be rejected,  
975 indicating the number of times a parameter is significantly different between groups) (from  
976 left to right). The relative abundance (%) are plotted on log10 scale. The notches in the  
977 boxplots show the 95% confidence interval around the median.

978

979

980

981

982

983

984

985

986

987

988

989

990

991

992

993 **Table S1. 16S rRNA gene sequencing metadata.**

994

| Sample ID | Mouse ID | Time point | Diet | Barcode-sequence | Raw sequence count | Final sequence count | Number of ASVs | Aging Status  |
|-----------|----------|------------|------|------------------|--------------------|----------------------|----------------|---------------|
| YY001     | A-1      | M21        | AL   | GGATACTCGCAT     | 154570             | 135037               | 106            | Normal aging  |
| YY004     | A-1      | M30        | AL   | ACTAGACGACTA     | 415374             | 352401               | 157            | Normal aging  |
| YY010     | A-21     | M21        | AL   | CTTGTGCGACAA     | 439383             | 373296               | 216            | Normal aging  |
| YY012     | A-21     | M30        | AL   | AGGTTAAGTGCT     | 422939             | 338440               | 250            | Normal aging  |
| YY013     | A-23     | M21        | AL   | ATGCTCTAGAGA     | 390427             | 324117               | 239            | Healthy aging |
| YY015     | A-23     | M30        | AL   | CGATTTAGGCCA     | 299124             | 248027               | 240            | Healthy aging |
| YY016     | A-24     | M21        | AL   | GGTACAATGATC     | 449154             | 380134               | 288            | Normal aging  |
| YY018     | A-24     | M30        | AL   | AGAGTAAGCCGG     | 382718             | 313578               | 229            | Normal aging  |
| YY019     | A-26     | M21        | CR   | GACACTCACCGT     | 371088             | 310319               | 300            | Healthy aging |
| YY021     | A-26     | M30        | CR   | AGCTAGCGTTCA     | 353458             | 290435               | 292            | Healthy aging |
| YY022     | A-27     | M21        | CR   | TCTTCTGCCCTA     | 371714             | 306639               | 293            | Normal aging  |
| YY024     | A-27     | M30        | CR   | ACTGTCCGAGTA     | 465584             | 388876               | 214            | Normal aging  |
| YY025     | A-28     | M21        | CR   | CTGATGTACACG     | 424321             | 351496               | 311            | Healthy aging |
| YY027     | A-28     | M30        | CR   | TCAGAGTAGACT     | 393168             | 311260               | 305            | Healthy aging |
| YY045     | A-81     | M21        | AL   | GTCAGACTAGC      | 338153             | 269337               | 176            | Normal aging  |
| YY053     | A-101    | M21        | AL   | ACTAATACGCGA     | 435557             | 391101               | 160            | Healthy aging |
| YY063     | A-281    | M21        | AL   | ACGAGGAGTCGA     | 415094             | 335968               | 226            | Normal aging  |
| YY066     | A-284    | M21        | AL   | ACATCCCTACTT     | 394919             | 322213               | 235            | Healthy aging |
| YY067     | A-289    | M21        | CR   | CCTTAAGGGCAT     | 438364             | 364232               | 177            | Healthy aging |
| YY068     | A-290    | M21        | CR   | TTCGTGAGGATA     | 418761             | 348879               | 156            | Healthy aging |
| YY071     | A-297    | M21        | AL   | GCGGTACTACTA     | 376527             | 320687               | 208            | Normal aging  |
| YY072     | A-298    | M21        | AL   | TCGTTCCAGGACC    | 441041             | 365541               | 195            | Normal aging  |
| YY073     | A-300    | M21        | AL   | CTTCTTCGCCCT     | 419897             | 352836               | 219            | Normal aging  |
| YY079     | A-306    | M21        | CR   | TCAGCTGACTAG     | 414372             | 337781               | 229            | Healthy aging |
| YY097     | A-81     | M30        | AL   | AGTCGAACGAGG     | 125864             | 113019               | 149            | Normal aging  |
| YY099     | A-101    | M30        | AL   | TGCAGTCCTCGA     | 143687             | 128409               | 157            | Healthy aging |
| YY101     | A-161    | M21        | AL   | GTGGAGTCTCAT     | 164126             | 160052               | 150            | Normal aging  |
| YY103     | A-161    | M30        | AL   | GCGTTCTAGCTG     | 152005             | 126296               | 148            | Normal aging  |
| YY104     | A-164    | M21        | AL   | GCTGTACGGATT     | 113804             | 110673               | 128            | Healthy aging |
| YY106     | A-164    | M30        | AL   | AGTCGTGCACAT     | 123834             | 110799               | 116            | Healthy aging |
| YY107     | A-165    | M21        | CR   | ACCATAGCTCCG     | 132298             | 124562               | 152            | Healthy aging |
| YY109     | A-165    | M30        | CR   | GCTCGAAGATTC     | 156099             | 141296               | 131            | Healthy aging |
| YY110     | A-166    | M21        | CR   | TAGGCATGCTTG     | 179628             | 174312               | 153            | Healthy aging |



|       |       |     |    |              |        |        |     |               |
|-------|-------|-----|----|--------------|--------|--------|-----|---------------|
| YY112 | A-166 | M30 | CR | ATCACCAGGTGT | 109369 | 101016 | 118 | Healthy aging |
| YY118 | A-184 | M21 | AL | GAGATCGCCTAT | 147393 | 142804 | 137 | Normal aging  |
| YY120 | A-184 | M30 | AL | TGGTCAACGATA | 91525  | 83645  | 95  | Normal aging  |
| YY126 | A-281 | M30 | AL | ATTCTGCCGAAG | 126405 | 98450  | 201 | Normal aging  |
| YY130 | A-284 | M30 | AL | CAAATTCGGGAT | 83711  | 75898  | 202 | Healthy aging |
| YY133 | A-289 | M30 | CR | ACTTCCAACCTC | 111893 | 96359  | 134 | Healthy aging |
| YY136 | A-290 | M30 | CR | GTCGTGTAGCCT | 117763 | 114010 | 176 | Healthy aging |
| YY142 | A-297 | M30 | AL | GTACGATATGAC | 199365 | 179853 | 161 | Normal aging  |
| YY145 | A-298 | M30 | AL | CCAATACGCCTG | 122230 | 113580 | 146 | Normal aging  |
| YY148 | A-300 | M30 | AL | TGTCGCAAATAG | 151897 | 136678 | 141 | Normal aging  |
| YY151 | A-306 | M30 | CR | TGTAACGCCGAT | 178578 | 159425 | 211 | Healthy aging |

995  
996  
997  
998  
999  
1000  
1001  
1002  
1003  
1004  
1005  
1006  
1007  
1008  
1009  
1010  
1011  
1012  
1013  
1014  
1015  
1016  
1017  
1018  
1019

1020 **Table S2. The effect of aging process on blood cells in circulation.** The data was shown as  
1021 mean  $\pm$  standard deviation. *P* value shown the results of Wilcoxon–Mann–Whitney test

1022 (unpaired) and Wilcoxon signed rank test (paired) adjusted using the Benjamini–Hochberg  
 1023 FDR method. WBC: White blood cell, NE: Neutrophils count, LY: Lymphocytes count, MO:  
 1024 Monocytes count, EO: Eosinophils count, BA: Basophils count, NEp: Neutrophils percentage,  
 1025 LYp: Lymphocytes percentage, MOp: Monocytes percentage, EOp: Eosinophils percentage,  
 1026 BA: Basophils percentage, RBC: Red blood cell count, Hb: Hemoglobin, HCT: Hematocrit,  
 1027 MCV: Mean corpuscular volume, MCH: Mean corpuscular hemoglobin, MCHC: Mean  
 1028 corpuscular hemoglobin concentration, RDW: Red cell distribution width, PLT: Platelet  
 1029 count, MPV: Mean platelet volume, NLR: Neutrophils to Lymphocytes ratio.  
 1030

| Blood markers | M21            |                |                | M30             |                |                 | Wilcoxon test  | Wilcoxon–Mann–Whitney test |                |                |                |              |              |
|---------------|----------------|----------------|----------------|-----------------|----------------|-----------------|----------------|----------------------------|----------------|----------------|----------------|--------------|--------------|
|               | M21 (n=22)     | M21_H (n=11)   | M21_N (n=11)   | M30 (n=19)      | M30_H (n=10)   | M30_N (n=9)     | M21_H vs M21_N | M21 vs M30                 | M21_H vs M30_H | M21_N vs M30_N | M30_H vs M30_N | M21 vs M30_H | M21 vs M30_N |
| WBC           | 9.830 ± 2.413  | 10.273 ± 2.034 | 9.387 ± 2.768  | 6.441 ± 4.273   | 6.814 ± 4.291  | 6.027 ± 4.472   | 0.966          | 0.022                      | 0.177          | 0.157          | 0.746          | 0.123        | 0.046        |
| NE            | 1.831 ± 0.63   | 2.021 ± 0.645  | 1.641 ± 0.581  | 2.183 ± 1.936   | 2.076 ± 1.438  | 2.301 ± 2.465   | 0.839          | 0.699                      | 0.578          | 0.97           | 0.941          | 0.871        | 0.792        |
| LY            | 7.756 ± 1.953  | 7.993 ± 1.565  | 7.52 ± 2.332   | 4.328 ± 2.691   | 5.135 ± 2.518  | 3.432 ± 2.729   | 0.943          | 0.001                      | 0.059          | 0.017          | 0.469          | 0.033        | 0.004        |
| MO            | 0.234 ± 0.082  | 0.25 ± 0.099   | 0.218 ± 0.061  | 0.271 ± 0.199   | 0.261 ± 0.162  | 0.282 ± 0.243   | 0.839          | 0.917                      | 0.874          | 0.873          | 0.967          | 0.871        | 1            |
| EO            | 0.008 ± 0.014  | 0.005 ± 0.009  | 0.011 ± 0.018  | 0.026 ± 0.071   | 0.041 ± 0.096  | 0.01 ± 0.019    | 0.839          | 0.443                      | 0.42           | 0.97           | 0.709          | 0.348        | 0.866        |
| BA            | 0.001 ± 0.003  | 0 ± 0          | 0.002 ± 0.004  | 0.001 ± 0.002   | 0 ± 0          | 0.001 ± 0.003   | 0.839          | 0.699                      | NA             | 0.873          | 0.6            | 0.441        | 0.944        |
| NEp           | 18.582 ± 3.969 | 19.552 ± 4.005 | 17.613 ± 3.87  | 33.034 ± 15.552 | 27.383 ± 8.807 | 39.312 ± 19.305 | 0.839          | 0.001                      | 0.059          | 0.016          | 0.51           | 0.009        | 0.005        |
| LYp           | 78.881 ± 4.36  | 77.948 ± 4.609 | 79.814 ± 4.093 | 61.905 ± 17.272 | 68.685 ± 9.708 | 54.372 ± 21.069 | 0.839          | 0.001                      | 0.059          | 0.016          | 0.51           | 0.009        | 0.005        |
| MOp           | 2.439 ± 0.804  | 2.422 ± 0.775  | 2.456 ± 0.87   | 4.69 ± 3.031    | 3.467 ± 1.208  | 6.049 ± 3.884   | 0.843          | 0.002                      | 0.12           | 0.016          | 0.414          | 0.07         | 0.004        |
| EOp           | 0.081 ± 0.113  | 0.063 ± 0.08   | 0.099 ± 0.14   | 0.312 ± 0.593   | 0.432 ± 0.784  | 0.179 ± 0.247   | 0.839          | 0.339                      | 0.474          | 0.777          | 0.967          | 0.378        | 0.56         |
| BAp           | 0.015 ± 0.019  | 0.012 ± 0.011  | 0.018 ± 0.024  | 0.046 ± 0.062   | 0.032 ± 0.045  | 0.061 ± 0.077   | 0.843          | 0.502                      | 0.874          | 0.542          | 0.709          | 0.871        | 0.391        |
| RBC           | 8.808 ±        | 9.08 ±         | 8.535 ±        | 7.608 ±         | 7.935 ±        | 7.246 ±         | 0.839          | 0.002                      | 0.012          | 0.196          | 0.6            | 0.009        | 0.053        |

|      |                          |                          |                          |                          |                        |                          |       |       |       |       |       |       |       |
|------|--------------------------|--------------------------|--------------------------|--------------------------|------------------------|--------------------------|-------|-------|-------|-------|-------|-------|-------|
|      | 1.217                    | 0.438                    | 1.66                     | 1.697                    | 0.742                  | 2.361                    |       |       |       |       |       |       |       |
| Hb   | 10.855 ±<br>1.698        | 11.273 ±<br>1.07         | 10.436 ±<br>2.128        | 9.837 ±<br>1.649         | 10.29 ±<br>0.61        | 9.333 ±<br>2.27          | 0.843 | 0.023 | 0.059 | 0.18  | 0.429 | 0.123 | 0.053 |
| HCT  | 37.518 ±<br>5.18         | 38.882 ±<br>1.982        | 36.155 ±<br>6.952        | 35.304 ±<br>6.621        | 35.647<br>± 3.047      | 34.922 ±<br>9.374        | 0.839 | 0.039 | 0.059 | 0.542 | 0.709 | 0.07  | 0.236 |
| MCV  | 59.432 ±<br>79.046       | 76.473 ±<br>111.721      | 42.391 ±<br>0.89         | 47.111 ±<br>5.321        | 45.17 ±<br>4.29        | 49.267 ±<br>5.75         | 0.839 | 0.005 | 0.316 | 0.016 | 0.467 | 0.084 | 0.009 |
| MCH  | 12.332 ±<br>0.978        | 12.409 ±<br>0.836        | 12.255 ±<br>1.139        | 13.126 ±<br>1.163        | 13.04 ±<br>0.9         | 13.222 ±<br>1.453        | 0.881 | 0.064 | 0.263 | 0.24  | 0.967 | 0.123 | 0.236 |
| MCHC | 28.932 ±<br>2.096        | 28.973 ±<br>1.826        | 28.891 ±<br>2.427        | 28.053 ±<br>2.756        | 29.01 ±<br>2.87        | 26.989 ±<br>2.323        | 0.919 | 0.396 | 0.874 | 0.18  | 0.383 | 0.871 | 0.083 |
| RDW  | 17.532 ±<br>0.764        | 17.655 ±<br>0.636        | 17.409 ±<br>0.888        | 19.621 ±<br>2.842        | 18.93 ±<br>2.155       | 20.389 ±<br>3.42         | 0.839 | 0.037 | 0.459 | 0.065 | 0.668 | 0.189 | 0.053 |
| PLT  | 1390.455<br>±<br>254.416 | 1470.727<br>±<br>253.589 | 1310.182<br>±<br>239.676 | 1561.263<br>±<br>418.144 | 1777.1<br>±<br>314.232 | 1321.444<br>±<br>399.227 | 0.839 | 0.234 | 0.063 | 0.873 | 0.226 | 0.009 | 0.56  |
| MPV  | 5.182 ±<br>0.168         | 5.2 ±<br>0.126           | 5.164 ±<br>0.206         | 5.537 ±<br>0.527         | 5.26 ±<br>0.19         | 5.844 ±<br>0.619         | 0.843 | 0.02  | 0.578 | 0.017 | 0.226 | 0.348 | 0.005 |
| NLR  | 0.239 ±<br>0.065         | 0.255 ±<br>0.068         | 0.224 ±<br>0.061         | 0.693 ±<br>0.646         | 0.425 ±<br>0.205       | 0.991 ±<br>0.837         | 0.839 | 0.001 | 0.059 | 0.016 | 0.51  | 0.009 | 0.005 |

1031  
1032  
1033  
1034  
1035  
1036  
1037  
1038  
1039  
1040  
1041  
1042  
1043  
1044  
1045  
1046  
1047

1048 **Table S3. The microbial features associated with blood markers identified by**  
1049 **MaAsLin2.** The relative abundance (%) was shown as mean  $\pm$  standard deviation.  
1050

| ASVs    | Taxonomy                                | Relative abundance (%) |
|---------|-----------------------------------------|------------------------|
| ASV890  | Ruminococcaceae                         | 0.004 $\pm$ 0.011      |
| ASV806  | Lachnospiraceae                         | 0.166 $\pm$ 0.394      |
| ASV5690 | <i>Flavonifractor plautii</i>           | 0.242 $\pm$ 0.397      |
| ASV5652 | Lachnospiraceae                         | 0.153 $\pm$ 0.355      |
| ASV5625 | Unclassified Firmicutes                 | 0.054 $\pm$ 0.234      |
| ASV5550 | Lachnospiraceae                         | 0.292 $\pm$ 0.671      |
| ASV555  | <i>Acetatifactor muris</i>              | 0.002 $\pm$ 0.005      |
| ASV5396 | <i>Acetatifactor muris</i>              | 0.025 $\pm$ 0.079      |
| ASV5138 | Unclassified Proteobacteria             | 0.108 $\pm$ 0.321      |
| ASV4558 | Bacteroidales                           | 0.355 $\pm$ 1.284      |
| ASV3949 | <i>Anaerotruncus</i>                    | 0.010 $\pm$ 0.018      |
| ASV3897 | Unclassified Bacteria                   | 0.019 $\pm$ 0.056      |
| ASV3729 | <i>Clostridium aldenense</i>            | 0.003 $\pm$ 0.010      |
| ASV3535 | <i>Muribaculum intestinale</i>          | 0.084 $\pm$ 0.226      |
| ASV2973 | <i>Intestinimonas butyriciproducens</i> | 0.006 $\pm$ 0.016      |
| ASV2878 | Lachnospiraceae                         | 0.020 $\pm$ 0.064      |
| ASV2868 | <i>Oscillibacter</i>                    | 0.007 $\pm$ 0.024      |
| ASV2733 | <i>Clostridium XIVa</i>                 | 0.048 $\pm$ 0.154      |
| ASV2710 | Unclassified Firmicutes                 | 0.001 $\pm$ 0.002      |
| ASV2261 | Ruminococcaceae                         | 0.001 $\pm$ 0.003      |
| ASV1983 | Ruminococcaceae                         | 0.043 $\pm$ 0.085      |
| ASV1970 | <i>Clostridium XIVa</i>                 | 0.036 $\pm$ 0.077      |
| ASV1513 | Lachnospiraceae                         | 0.002 $\pm$ 0.002      |
| ASV1466 | Unclassified Firmicutes                 | 0.005 $\pm$ 0.018      |

1051  
1052  
1053  
1054  
1055  
1056  
1057  
1058  
1059  
1060

1061 **Table S4. The microbial features associated with Frailty index identified by MaAsLin2.**

1062 The relative abundance (%) was shown as mean  $\pm$  standard deviation.

1063

| ASVs    | Taxonomy                           | Relative abundance (%) |
|---------|------------------------------------|------------------------|
| ASV3100 | <i>Clostridium sensu stricto</i>   | 4.148 $\pm$ 5.608      |
| ASV2882 | <i>Clostridium XIVa</i>            | 0.108 $\pm$ 0.133      |
| ASV847  | <i>Phoceia massiliensis</i>        | 0.004 $\pm$ 0.008      |
| ASV338  | Lachnospiraceae                    | 0.011 $\pm$ 0.039      |
| ASV1726 | <i>Parabacteroides goldsteinii</i> | 13.017 $\pm$ 13.852    |
| ASV5389 | Lachnospiraceae                    | 1.061 $\pm$ 1.702      |
| ASV1123 | <i>Enterorhabdus</i>               | 0.018 $\pm$ 0.025      |
| ASV1101 | <i>Clostridium XIVa</i>            | 0.025 $\pm$ 0.025      |
| ASV807  | Bacteria                           | 0.001 $\pm$ 0.003      |
| ASV742  | Lachnospiraceae                    | 0.010 $\pm$ 0.033      |
| ASV157  | <i>Subdoligranulum variabile</i>   | 0.131 $\pm$ 0.243      |
| ASV232  | Ruminococcaceae                    | 0.009 $\pm$ 0.014      |
| ASV2980 | Lachnospiraceae                    | 0.101 $\pm$ 0.220      |
| ASV466  | Lachnospiraceae                    | 0.028 $\pm$ 0.080      |

1064

1065

1066

1067

1068

1069

1070

1071

1072

1073

1074

1075

1076

1077

1078

1079

1080

1081

1082

1083

1084 **Table S5. Differentially abundant taxa between 21 and 30 months of age in healthy**  
 1085 **aging mice detected by ANCOM, adjusted for cage, cohort and diet.** For each ASV, the  
 1086 first column represents its taxonomy information, the second column represents its W score  
 1087 and subsequent four columns represent logical indicators of whether it is differentially  
 1088 abundant under a series of cutoffs (0.9, 0.8, 0.7, and 0.6, a prevalence cutoff on the entire set  
 1089 of ASVs). The last two columns denote its relative abundance (%) in each group shown as  
 1090 mean  $\pm$  standard deviation.

| ASVs    | Taxonomy                             | W_score | detected_0.9 | detected_0.8 | detected_0.7 | detected_0.6 | M21H                | M30H              |
|---------|--------------------------------------|---------|--------------|--------------|--------------|--------------|---------------------|-------------------|
| ASV4247 | Unclassified Firmicutes              | 368     | TRUE         | TRUE         | TRUE         | TRUE         | 0 $\pm$ 0           | 1.357 $\pm$ 1.883 |
| ASV1060 | <i>Enterorhabdus muris</i>           | 352     | TRUE         | TRUE         | TRUE         | TRUE         | 0 $\pm$ 0           | 0.039 $\pm$ 0.023 |
| ASV5550 | Lachnospiraceae                      | 350     | TRUE         | TRUE         | TRUE         | TRUE         | 0 $\pm$ 0           | 0.631 $\pm$ 0.797 |
| ASV5652 | Lachnospiraceae                      | 345     | TRUE         | TRUE         | TRUE         | TRUE         | 0 $\pm$ 0           | 0.331 $\pm$ 0.44  |
| ASV4147 | <i>Eubacterium coprostanoligenes</i> | 331     | FALSE        | TRUE         | TRUE         | TRUE         | 0.622 $\pm$ 0.836   | 0.174 $\pm$ 0.414 |
| ASV5435 | <i>Muribaculum intestinale</i>       | 330     | FALSE        | TRUE         | TRUE         | TRUE         | 0.275 $\pm$ 0.906   | 7.51 $\pm$ 8.01   |
| ASV806  | Lachnospiraceae                      | 326     | FALSE        | TRUE         | TRUE         | TRUE         | 0 $\pm$ 0           | 0.345 $\pm$ 0.446 |
| ASV608  | Unclassified Firmicutes              | 324     | FALSE        | TRUE         | TRUE         | TRUE         | 0.196 $\pm$ 0.648   | 5.741 $\pm$ 7.033 |
| ASV3361 | Clostridiales                        | 277     | FALSE        | FALSE        | TRUE         | TRUE         | 0.027 $\pm$ 0.032   | 0.002 $\pm$ 0.006 |
| ASV2776 | Unclassified Firmicutes              | 275     | FALSE        | FALSE        | TRUE         | TRUE         | 0.054 $\pm$ 0.123   | 0.74 $\pm$ 1.023  |
| ASV2756 | <i>Acetatifactor muris</i>           | 261     | FALSE        | FALSE        | FALSE        | TRUE         | 0.017 $\pm$ 0.024   | 0.069 $\pm$ 0.042 |
| ASV2609 | Ruminococcaceae                      | 256     | FALSE        | FALSE        | FALSE        | TRUE         | 0.018 $\pm$ 0.046   | 0.085 $\pm$ 0.1   |
| ASV5628 | <i>Muribaculum intestinale</i>       | 254     | FALSE        | FALSE        | FALSE        | TRUE         | 0.145 $\pm$ 0.258   | 1.845 $\pm$ 2.288 |
| ASV16   | <i>Clostridium bolteae</i>           | 253     | FALSE        | FALSE        | FALSE        | TRUE         | 0.034 $\pm$ 0.049   | 0.001 $\pm$ 0.002 |
| ASV3370 | <i>Muribaculum intestinale</i>       | 250     | FALSE        | FALSE        | FALSE        | TRUE         | 1.013 $\pm$ 3.359   | 1.042 $\pm$ 2.593 |
| ASV1726 | <i>Parabacteroides goldsteinii</i>   | 248     | FALSE        | FALSE        | FALSE        | TRUE         | 20.989 $\pm$ 20.721 | 5.247 $\pm$ 4.615 |
| ASV3224 | <i>Clostridium cocleatum</i>         | 246     | FALSE        | FALSE        | FALSE        | TRUE         | 0.275 $\pm$ 0.555   | 0.558 $\pm$ 0.461 |
| ASV4595 | <i>Clostridium leptum</i>            | 234     | FALSE        | FALSE        | FALSE        | TRUE         | 0.121 $\pm$ 0.169   | 0.024 $\pm$ 0.04  |
| ASV5389 | Lachnospiraceae                      | 229     | FALSE        | FALSE        | FALSE        | TRUE         | 0.369 $\pm$ 0.731   | 1.192 $\pm$ 1.241 |

1091  
 1092  
 1093  
 1094  
 1095  
 1096  
 1097  
 1098  
 1099  
 1100  
 1101

1102 **Table S6. Differentially abundant taxa between 21 and 30 months of age in normal**  
 1103 **aging mice detected by ANCOM, adjusted for cage, cohort and diet.** For each ASV, the  
 1104 first column represents its taxonomy information, the second column represents its W score  
 1105 and subsequent four columns represent logical indicators of whether it is differentially  
 1106 abundant under a series of cutoffs (0.9, 0.8, 0.7, and 0.6, a prevalence cutoff on the entire set  
 1107 of ASVs). The last two columns denote its relative abundance (%) in each group shown as  
 1108 mean  $\pm$  standard deviation.  
 1109

| ASVs    | Taxonomy                          | W_score | detected_0.9 | detected_0.8 | detected_0.7 | detected_0.6 | M21N              | M30N              |
|---------|-----------------------------------|---------|--------------|--------------|--------------|--------------|-------------------|-------------------|
| ASV5550 | Lachnospiraceae                   | 334     | TRUE         | TRUE         | TRUE         | TRUE         | 0 $\pm$ 0         | 0.477 $\pm$ 0.938 |
| ASV806  | Lachnospiraceae                   | 327     | TRUE         | TRUE         | TRUE         | TRUE         | 0 $\pm$ 0         | 0.283 $\pm$ 0.576 |
| ASV3224 | <i>Clostridium cocleatum</i>      | 327     | TRUE         | TRUE         | TRUE         | TRUE         | 0.48 $\pm$ 1.005  | 0.955 $\pm$ 0.931 |
| ASV5652 | Lachnospiraceae                   | 326     | TRUE         | TRUE         | TRUE         | TRUE         | 0 $\pm$ 0         | 0.248 $\pm$ 0.481 |
| ASV5435 | <i>Muribaculum intestinale</i>    | 316     | FALSE        | TRUE         | TRUE         | TRUE         | 0.001 $\pm$ 0.002 | 4.381 $\pm$ 7.109 |
| ASV3100 | <i>Clostridium sensu stricto</i>  | 296     | FALSE        | TRUE         | TRUE         | TRUE         | 1.222 $\pm$ 2.458 | 8.285 $\pm$ 6.248 |
| ASV3370 | <i>Muribaculum intestinale</i>    | 285     | FALSE        | FALSE        | TRUE         | TRUE         | 1.091 $\pm$ 2.427 | 2.785 $\pm$ 3.561 |
| ASV1053 | Unclassified Bacteria             | 278     | FALSE        | FALSE        | TRUE         | TRUE         | 0.331 $\pm$ 0.39  | 0.001 $\pm$ 0.004 |
| ASV1812 | <i>Anaerotruncus rubiinfantis</i> | 263     | FALSE        | FALSE        | TRUE         | TRUE         | 0.025 $\pm$ 0.017 | 0.004 $\pm$ 0.004 |
| ASV570  | <i>Muribaculum intestinale</i>    | 258     | FALSE        | FALSE        | TRUE         | TRUE         | 0.665 $\pm$ 1.52  | 1.999 $\pm$ 3.191 |
| ASV5628 | <i>Muribaculum intestinale</i>    | 254     | FALSE        | FALSE        | TRUE         | TRUE         | 0.03 $\pm$ 0.077  | 1 $\pm$ 1.592     |
| ASV3550 | Erysipelotrichaceae               | 250     | FALSE        | FALSE        | FALSE        | TRUE         | 0.052 $\pm$ 0.079 | 0 $\pm$ 0         |
| ASV1101 | <i>Clostridium XIVa</i>           | 238     | FALSE        | FALSE        | FALSE        | TRUE         | 0.038 $\pm$ 0.023 | 0.007 $\pm$ 0.006 |
| ASV360  | <i>Streptococcus danieliae</i>    | 220     | FALSE        | FALSE        | FALSE        | TRUE         | 0 $\pm$ 0         | 0.008 $\pm$ 0.01  |

1110  
 1111  
 1112  
 1113  
 1114  
 1115  
 1116  
 1117  
 1118  
 1119  
 1120  
 1121  
 1122  
 1123  
 1124

1125 **Table S7. Differentially abundant taxa between 21 and 30 months of age detected by**  
 1126 **ANCOM, adjusted for cage, cohort and diet.** For each ASV, the first column represents its  
 1127 taxonomy information, the second column represents its W score and subsequent four  
 1128 columns represent logical indicators of whether it is differentially abundant under a series of  
 1129 cutoffs (0.9, 0.8, 0.7, and 0.6, a prevalence cutoff on the entire set of ASVs). The last two  
 1130 columns denote its relative abundance (%) in each group shown as mean  $\pm$  standard  
 1131 deviation.  
 1132

| ASVs    | Taxonomy                             | W_score | detected_0.9 | detected_0.8 | detected_0.7 | detected_0.6 | M21               | M30               |
|---------|--------------------------------------|---------|--------------|--------------|--------------|--------------|-------------------|-------------------|
| ASV5550 | Lachnospiraceae                      | 375     | TRUE         | TRUE         | TRUE         | TRUE         | 0 $\pm$ 0         | 0.554 $\pm$ 0.853 |
| ASV4147 | <i>Eubacterium coprostanoligenes</i> | 372     | TRUE         | TRUE         | TRUE         | TRUE         | 0.55 $\pm$ 0.661  | 0.178 $\pm$ 0.332 |
| ASV4247 | Unclassified Firmicutes              | 369     | TRUE         | TRUE         | TRUE         | TRUE         | 0.189 $\pm$ 0.886 | 1.879 $\pm$ 5.061 |
| ASV5435 | <i>Muribaculum intestinale</i>       | 369     | TRUE         | TRUE         | TRUE         | TRUE         | 0.138 $\pm$ 0.641 | 5.946 $\pm$ 7.562 |
| ASV3224 | <i>Clostridium cocleatum</i>         | 366     | TRUE         | TRUE         | TRUE         | TRUE         | 0.377 $\pm$ 0.798 | 0.756 $\pm$ 0.745 |
| ASV5652 | Lachnospiraceae                      | 366     | TRUE         | TRUE         | TRUE         | TRUE         | 0 $\pm$ 0         | 0.29 $\pm$ 0.452  |
| ASV806  | Lachnospiraceae                      | 365     | TRUE         | TRUE         | TRUE         | TRUE         | 0 $\pm$ 0         | 0.314 $\pm$ 0.504 |
| ASV608  | Unclassified Firmicutes              | 360     | TRUE         | TRUE         | TRUE         | TRUE         | 0.123 $\pm$ 0.466 | 4.633 $\pm$ 8.181 |
| ASV3370 | <i>Muribaculum intestinale</i>       | 357     | TRUE         | TRUE         | TRUE         | TRUE         | 1.052 $\pm$ 2.86  | 1.914 $\pm$ 3.168 |
| ASV5628 | <i>Muribaculum intestinale</i>       | 354     | TRUE         | TRUE         | TRUE         | TRUE         | 0.087 $\pm$ 0.195 | 1.422 $\pm$ 1.971 |
| ASV5266 | <i>Clostridium XIVa</i>              | 342     | FALSE        | TRUE         | TRUE         | TRUE         | 0 $\pm$ 0         | 1.084 $\pm$ 2.245 |
| ASV2776 | Unclassified Firmicutes              | 341     | FALSE        | TRUE         | TRUE         | TRUE         | 0.05 $\pm$ 0.125  | 0.534 $\pm$ 0.842 |
| ASV1060 | <i>Enterorhabdus muris</i>           | 340     | FALSE        | TRUE         | TRUE         | TRUE         | 0.003 $\pm$ 0.007 | 0.025 $\pm$ 0.023 |
| ASV3550 | Erysipelotrichaceae                  | 332     | FALSE        | TRUE         | TRUE         | TRUE         | 0.056 $\pm$ 0.093 | 0 $\pm$ 0         |
| ASV5389 | Lachnospiraceae                      | 327     | FALSE        | TRUE         | TRUE         | TRUE         | 0.432 $\pm$ 0.738 | 1.69 $\pm$ 2.134  |
| ASV1053 | Unclassified Bacteria                | 324     | FALSE        | TRUE         | TRUE         | TRUE         | 0.224 $\pm$ 0.348 | 0.09 $\pm$ 0.417  |
| ASV157  | <i>Subdoligranulum variable</i>      | 318     | FALSE        | TRUE         | TRUE         | TRUE         | 0.196 $\pm$ 0.284 | 0.066 $\pm$ 0.176 |
| ASV1101 | <i>Clostridium XIVa</i>              | 318     | FALSE        | TRUE         | TRUE         | TRUE         | 0.039 $\pm$ 0.027 | 0.012 $\pm$ 0.013 |
| ASV3100 | <i>Clostridium sensu stricto</i>     | 318     | FALSE        | TRUE         | TRUE         | TRUE         | 1.776 $\pm$ 3.757 | 6.518 $\pm$ 6.203 |
| ASV3306 | <i>Clostridium lactatifermentans</i> | 316     | FALSE        | TRUE         | TRUE         | TRUE         | 0.098 $\pm$ 0.112 | 0.261 $\pm$ 0.154 |
| ASV1970 | <i>Clostridium XIVa</i>              | 312     | FALSE        | TRUE         | TRUE         | TRUE         | 0.005 $\pm$ 0.013 | 0.071 $\pm$ 0.103 |
| ASV4595 | <i>Clostridium leptum</i>            | 310     | FALSE        | TRUE         | TRUE         | TRUE         | 0.102 $\pm$ 0.126 | 0.055 $\pm$ 0.129 |
| ASV5149 | Lachnospiraceae                      | 310     | FALSE        | TRUE         | TRUE         | TRUE         | 0.004 $\pm$ 0.017 | 0.046 $\pm$ 0.109 |
| ASV2609 | Ruminococcaceae                      | 308     | FALSE        | TRUE         | TRUE         | TRUE         | 0.02 $\pm$ 0.043  | 0.058 $\pm$ 0.078 |
| ASV3260 | <i>Longibaculum muris</i>            | 308     | FALSE        | TRUE         | TRUE         | TRUE         | 0.068 $\pm$ 0.07  | 0.025 $\pm$ 0.033 |
| ASV360  | <i>Streptococcus danieliae</i>       | 305     | FALSE        | FALSE        | TRUE         | TRUE         | 0 $\pm$ 0         | 0.006 $\pm$ 0.009 |
| ASV3447 | Erysipelotrichaceae                  | 300     | FALSE        | FALSE        | TRUE         | TRUE         | 0.058 $\pm$ 0.096 | 0.002 $\pm$ 0.005 |
| ASV1726 | <i>Parabacteroides</i>               | 299     | FALSE        | FALSE        | TRUE         | TRUE         | 19.963 $\pm$      | 6.07 $\pm$ 4.97   |



|         |                                   |     |       |       |       |      |               |               |
|---------|-----------------------------------|-----|-------|-------|-------|------|---------------|---------------|
|         | <i>goldsteinii</i>                |     |       |       |       |      | 16.342        |               |
| ASV570  | <i>Muribaculum intestinale</i>    | 292 | FALSE | FALSE | TRUE  | TRUE | 1.52 ± 3.134  | 1.592 ± 2.524 |
| ASV4275 | <i>Proteus</i>                    | 284 | FALSE | FALSE | TRUE  | TRUE | 0 ± 0         | 0.01 ± 0.025  |
| ASV2075 | Lachnospiraceae                   | 283 | FALSE | FALSE | TRUE  | TRUE | 0.131 ± 0.492 | 0.097 ± 0.154 |
| ASV2066 | <i>Clostridium saccharogumia</i>  | 280 | FALSE | FALSE | TRUE  | TRUE | 0.05 ± 0.084  | 0 ± 0         |
| ASV2904 | Lachnospiraceae                   | 278 | FALSE | FALSE | TRUE  | TRUE | 0 ± 0         | 0.174 ± 0.52  |
| ASV3361 | Clostridiales                     | 274 | FALSE | FALSE | TRUE  | TRUE | 0.021 ± 0.025 | 0.004 ± 0.007 |
| ASV3840 | <i>Eubacterium siraeum</i>        | 272 | FALSE | FALSE | TRUE  | TRUE | 0.023 ± 0.033 | 0 ± 0.002     |
| ASV3141 | <i>Clostridium methylpentosum</i> | 270 | FALSE | FALSE | TRUE  | TRUE | 0.012 ± 0.013 | 0.003 ± 0.008 |
| ASV4737 | Lachnospiraceae                   | 267 | FALSE | FALSE | FALSE | TRUE | 0.059 ± 0.173 | 0.159 ± 0.275 |
| ASV16   | <i>Clostridium bolteae</i>        | 253 | FALSE | FALSE | FALSE | TRUE | 0.02 ± 0.037  | 0.002 ± 0.005 |
| ASV3400 | <i>Clostridium XIVb</i>           | 253 | FALSE | FALSE | FALSE | TRUE | 0.068 ± 0.098 | 0.017 ± 0.026 |
| ASV1762 | <i>Clostridium scindens</i>       | 249 | FALSE | FALSE | FALSE | TRUE | 0 ± 0         | 0.022 ± 0.047 |
| ASV5225 | Unclassified Firmicutes           | 244 | FALSE | FALSE | FALSE | TRUE | 0.001 ± 0.002 | 0.006 ± 0.007 |
| ASV613  | <i>Flintibacter butyricus</i>     | 232 | FALSE | FALSE | FALSE | TRUE | 0.002 ± 0.007 | 0.015 ± 0.036 |

1133

1134

1135

1136

1137

1138

1139

1140

1141

1142

1143

1144

1145

1146

1147

1148

1149

1150

1151

1152

1153

1154 **Table S8. Differentially abundant taxa between healthy and normal aging mice at 21**

1155 **months of age detected by ANCOM, adjusted for cage, cohort and diet. For each ASV,**

1156 the first column represents its taxonomy information, the second column represents its W  
 1157 score and subsequent four columns represent logical indicators of whether it is differentially  
 1158 abundant under a series of cutoffs (0.9, 0.8, 0.7, and 0.6, a prevalence cutoff on the entire set  
 1159 of ASVs). The last two columns denote its relative abundance (%) in each group shown as  
 1160 mean  $\pm$  standard deviation.

1161

| ASVs    | Taxonomy                       | W_score | detected_<br>0.9 | detected_<br>0.8 | detected_<br>0.7 | detected_<br>0.6 | Healthy aging<br>(M21H) | Normal aging<br>(M21N) |
|---------|--------------------------------|---------|------------------|------------------|------------------|------------------|-------------------------|------------------------|
| ASV2048 | <i>Muribaculum intestinale</i> | 366     | TRUE             | TRUE             | TRUE             | TRUE             | 5.129 $\pm$ 7.579       | 1.2 $\pm$ 3.98         |
| ASV570  | <i>Muribaculum intestinale</i> | 289     | FALSE            | FALSE            | TRUE             | TRUE             | 2.375 $\pm$ 4.087       | 0.665 $\pm$ 1.52       |
| ASV1959 | Porphyromonadaceae             | 268     | FALSE            | FALSE            | TRUE             | TRUE             | 0.982 $\pm$ 1.702       | 0.513 $\pm$ 1.483      |
| ASV3256 | Porphyromonadaceae             | 260     | FALSE            | FALSE            | FALSE            | TRUE             | 0.841 $\pm$ 1.441       | 0.44 $\pm$ 1.258       |
| ASV1791 | Porphyromonadaceae             | 238     | FALSE            | FALSE            | FALSE            | TRUE             | 0.395 $\pm$ 0.688       | 0.202 $\pm$ 0.58       |
| ASV4558 | Bacteroidales                  | 232     | FALSE            | FALSE            | FALSE            | TRUE             | 1.063 $\pm$ 2.401       | 0.156 $\pm$ 0.452      |

1162

1163

1164

1165

1166

1167

1168

1169

1170

1171

1172

1173

1174

1175

1176

1177

1178

1179

1180

1181

1182

1183

1184 **Table S9. Differentially abundant taxa between healthy and normal aging mice at 30**  
 1185 **months of age detected by ANCOM, adjusted for cage, cohort and diet.** For each ASV,  
 1186 the first column represents its taxonomy information, the second column represents its W

1187 score and subsequent four columns represent logical indicators of whether it is differentially  
1188 abundant under a series of cutoffs (0.9, 0.8, 0.7, and 0.6, a prevalence cutoff on the entire set  
1189 of ASVs). The last two columns denote its relative abundance (%) in each group shown as  
1190 mean  $\pm$  standard deviation.  
1191

| ASVs    | Taxonomy                         | W_score | detected_0.9 | detected_0.8 | detected_0.7 | detected_0.6 | Healthy aging (M30H) | Normal aging (M30N) |
|---------|----------------------------------|---------|--------------|--------------|--------------|--------------|----------------------|---------------------|
| ASV648  | <i>Akkermansia muciniphila</i>   | 323     | TRUE         | TRUE         | TRUE         | TRUE         | 15.487 $\pm$ 18.623  | 3.812 $\pm$ 6.979   |
| ASV73   | Ruminococcaceae                  | 300     | FALSE        | TRUE         | TRUE         | TRUE         | 0.298 $\pm$ 0.566    | 0 $\pm$ 0           |
| ASV2756 | <i>Acetatifactor muris</i>       | 270     | FALSE        | FALSE        | TRUE         | TRUE         | 0.069 $\pm$ 0.042    | 0.02 $\pm$ 0.033    |
| ASV3370 | <i>Muribaculum intestinale</i>   | 258     | FALSE        | FALSE        | TRUE         | TRUE         | 1.042 $\pm$ 2.593    | 2.785 $\pm$ 3.561   |
| ASV698  | Unclassified Bacteria            | 253     | FALSE        | FALSE        | TRUE         | TRUE         | 0.935 $\pm$ 1.527    | 1.547 $\pm$ 2.031   |
| ASV3100 | <i>Clostridium sensu stricto</i> | 248     | FALSE        | FALSE        | TRUE         | TRUE         | 4.75 $\pm$ 5.907     | 8.285 $\pm$ 6.248   |
| ASV2776 | Unclassified Firmicutes          | 228     | FALSE        | FALSE        | FALSE        | TRUE         | 0.74 $\pm$ 1.023     | 0.329 $\pm$ 0.591   |
| ASV3939 | <i>Turicibacter sanguinis</i>    | 218     | FALSE        | FALSE        | FALSE        | TRUE         | 2.442 $\pm$ 3.116    | 2.59 $\pm$ 3.045    |
| ASV1123 | <i>Enterorhabdus</i>             | 216     | FALSE        | FALSE        | FALSE        | TRUE         | 0.003 $\pm$ 0.006    | 0.011 $\pm$ 0.009   |

1192

1193

1194
